# Supplementary material
Source: PubMed Central journal article supplement (PMC7477017)
Supplement: mmc1.pdf [file mmc1.pdf]

**The American Journal of Human Genetics, Volume 107**

## **Supplemental Data**

### **Interpretable Clinical Genomics with a Likelihood Ratio Paradigm**

**Peter N. Robinson, Vida Ravanmehr, Julius O.B. Jacobsen, Daniel Danis, Xingmin Aaron Zhang, Leigh C. Carmody, Michael A. Gargano, Courtney L. Thaxton, UNC Biocuration Core, Guy Karlebach, Justin Reese, Manuel Holtgrewe, Sebastian Köhler, Julie A. McMurry, Melissa A. Haendel, and Damian Smedley**

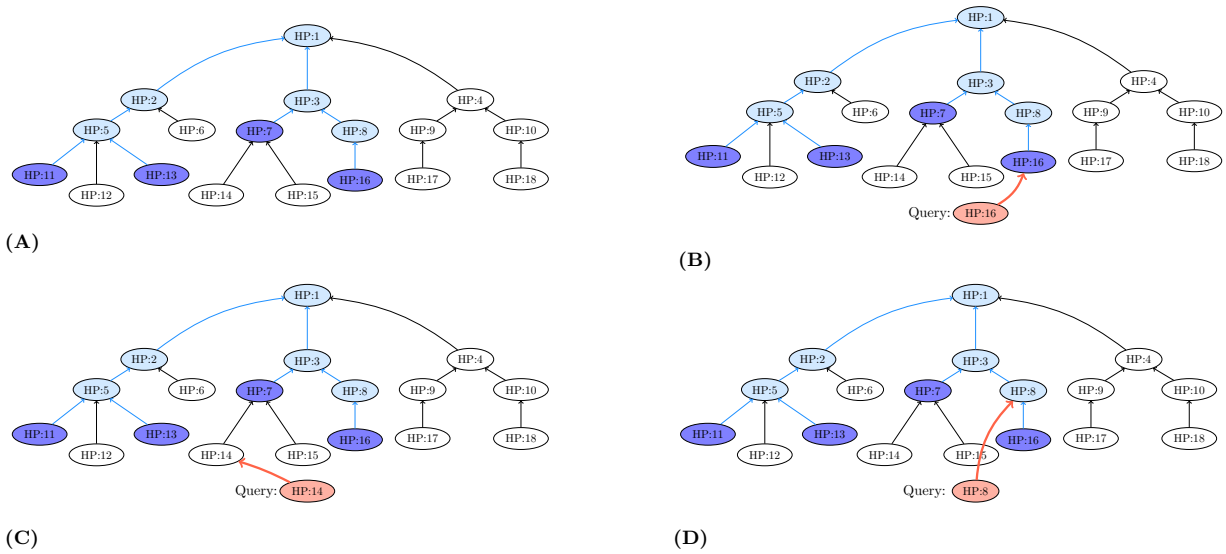

**Figure S1. Calculating the likelihood ratios for phenotypes.** (A) We will explain how the likelihood ratios (LR) for phenotypes are calculated using the example ontology shown here. The ontology contains 17 terms. For a certain disease, which we will call  $\mathcal{D}$ , four of the terms are directly annotated (HP:7, HP:11, HP:13, and HP:16, shown in dark blue). Because of the propagation of annotations, each of the ancestors of these terms is implicitly annotated to  $\mathcal{D}$  as well (the terms are shown in light blue, and the edges encoding this inheritance are also shown in light blue). For instance, if HP:15 refers to **Nuclear cataract**, HP:8 refers to **Cataract**, and HP:3 refers to **Abnormal lens morphology**, then if we annotate disease  $\mathcal{D}$  to **Nuclear cataract**, then we are also stating that the disease is characterized by **Cataract** and by **Abnormal lens morphology**. The term HP:1 is the root of this ontology (comparable to **Phenotypic abnormality** in the full HPO); (B) In this case a query term matches one of the directly annotated terms exactly. Then probability of observing HP:16 in an individual with  $\mathcal{D}$  is simply the frequency of HP:16 in  $\mathcal{D}$ , or  $P(h_{16}|\mathcal{D}) = f_{16}^{\mathcal{D}}$ ; (C) In this case, the query (HP:14) term matches a descendent of HP:7. HP:14 is not itself annotated to  $\mathcal{D}$ . In this case, we assume that the direct annotation (HP:7) is equally likely to correspond to an of its  $k$  subterms. If we assume that all individuals with disease  $\mathcal{D}$  have the phenotypic feature represented by HP:7, then the frequency is 100%, i.e.,  $f_7^{\mathcal{D}} = 1.0$ . We therefore divide this frequency by  $k$ . In this case, HP:7 has two descendents and  $k = 2$ , and therefore  $P(h_{14}|\mathcal{D}) = \frac{f_7^{\mathcal{D}}}{2} = 0.5$ ; (D) Here, the query is to HP:8, an ancestor of a term that is directly annotated to  $\mathcal{D}$ . Because of annotation propagation, the probability of observing HP:8 in individuals with this disease is equivalent to the probability of observing HP:16, viz.,  $P(h_8|\mathcal{D}) = f_{16}^{\mathcal{D}}$ .

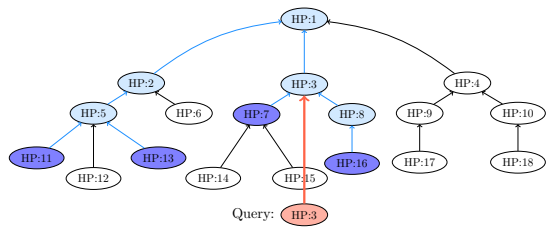

(E)

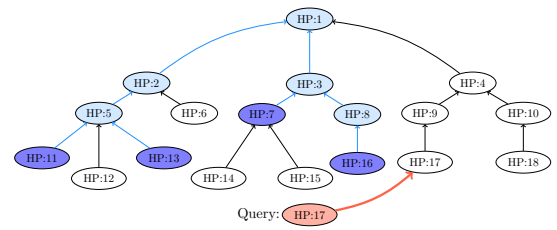

(F)

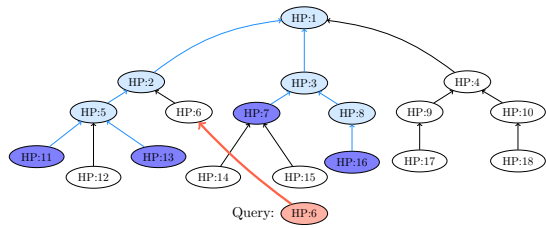

(G)

**Figure S1. Calculating the likelihood ratios for phenotypes (continued).** (E) HP:3 is an ancestor of two terms used to annotate  $\mathcal{D}$ . Here the maximum probability of HP:7 and HP:16 is taken, i.e.,  $P(h_3|\mathcal{D}) = \max(f_7^{\mathcal{D}}, f_{16}^{\mathcal{D}})$ ; (F and G) In this case, the query term is not directly annotated in the disease and is not a subclass of a disease term, nor is a disease term a subclass of the query term. Following the graph, the query term and some disease annotation have a common ancestor. This common ancestor can be a root term (F) or a non-root term (G). If their common ancestor is at the root, then the query does not affect an organ that is affected by the disease. An arbitrary small likelihood ratio of  $\frac{1}{100}$  is assigned in this case. If there is a common ancestor below the root ( $h_{ca}$ ), then the query term affects the same organ as the disease annotation without being a closely matched feature. In this case, we model the probability as being related to the overall frequency of the feature in the HPO corpus, but set the probability to be a minimum of  $\frac{1}{100}$  to avoid an overly large influence of very rare features.

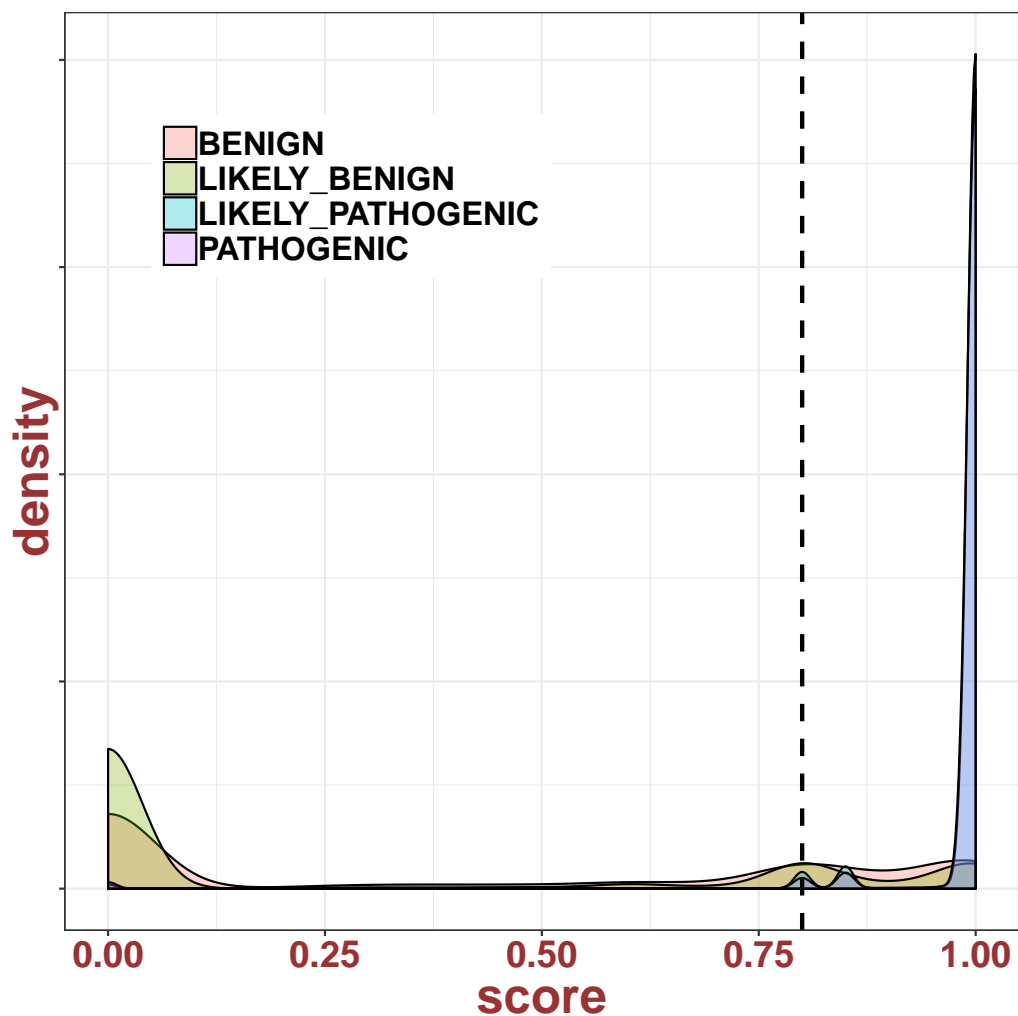

**Figure S2.** The Exomiser predicted pathogenicity score was calculated for each variant in ClinVar whose genomic position was precisely specified as nucleotide positions (these tend to be single-nucleotide variants or variants encompassing a small number of nucleotides rather than structural variants). A total of 160,714 such variants were available for analysis in the Exomiser data distribution version 12.1.0. There were 16,499 **benign** variants (10.3%), 64,123 **likely benign** variants (39.9%), 27,830 **likely pathogenic** variants (17.3%), and 52,262 **pathogenic** variants (32.5%). For the purpose of this analysis, the category **likely benign** or **benign** was assigned to **likely benign**, and **likely pathogenic** or **pathogenic** was assigned to **likely pathogenic**. In this work, a threshold pathogenicity score of 0.8 was chosen. The percentages of variants with an Exomiser score of at least 0.8 was: **benign**: 36.1%, **likely benign**: 26.5%, **likely pathogenic**: 99.3%, and **pathogenic**: 98.9%. The analysis was performed using the hg19 data. Similar results were obtained for hg38.

(a)

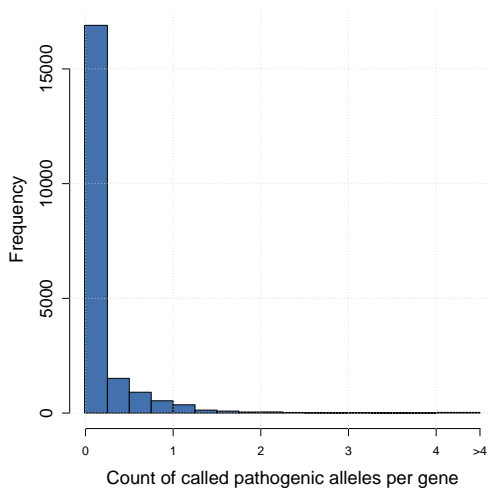

(b)

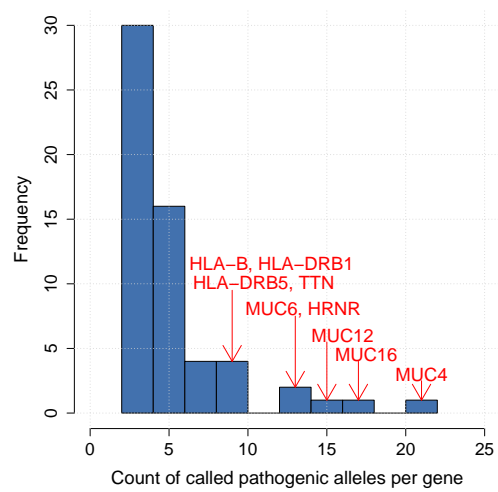

**Figure S3. Frequencies of called pathogenic variants per gene.** The frequencies of variants whose predicted pathogenicity score was 0.8 or higher was summed for each of 20,632 protein-coding genes and the count (frequency) of genes is plotted. Data are derived from the hg19 gnomAD dataset. Similar results were obtained for hg38. (a) An overview of the entire distribution. (b) Counts are shown for the 59 genes with counts above 3. Gene symbols are shown for all genes with counts above 8.

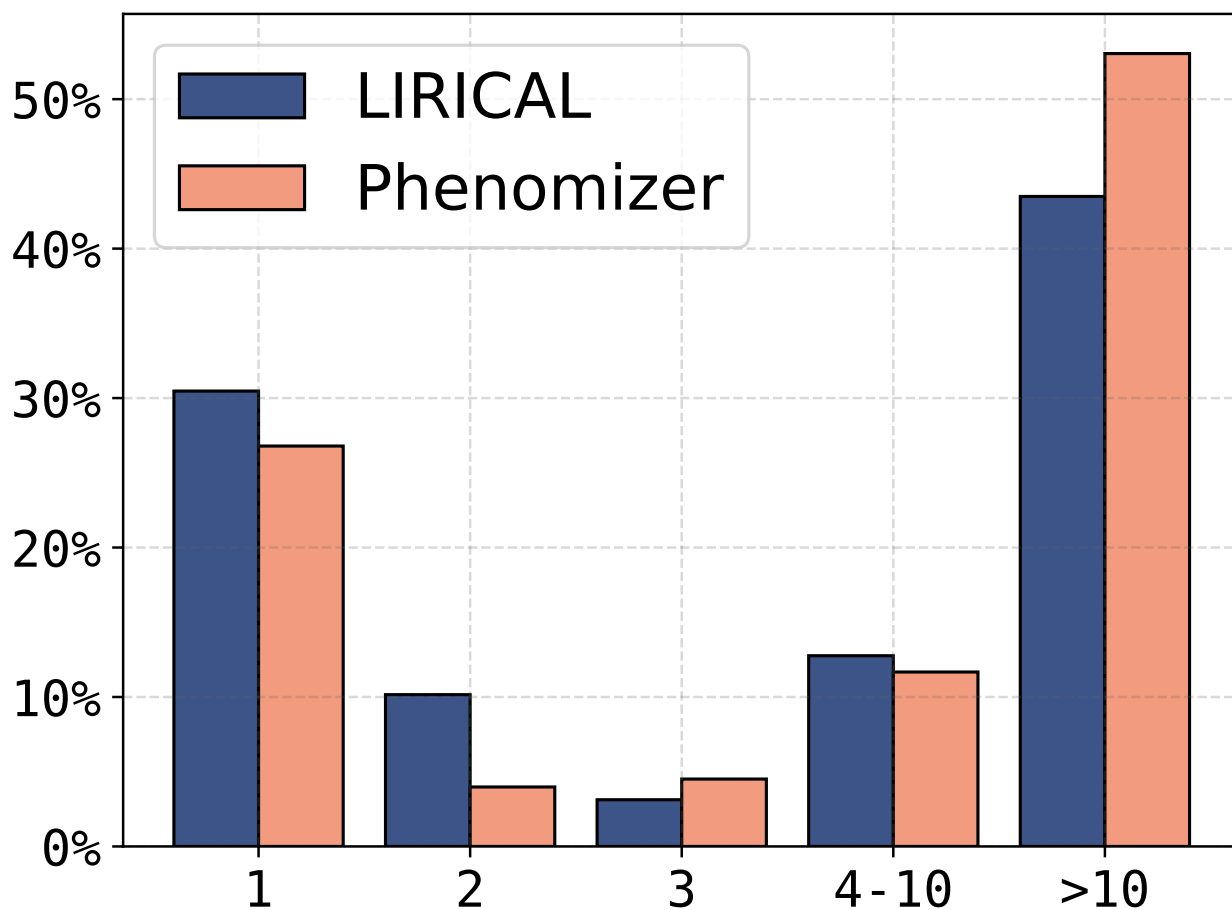

**Figure S4. Comparison of LIRICAL and Phenomizer.** The performance of LIRICAL (phenotype-only mode) was compared with that of Phenomizer [1] on the dataset of 384 Phenopackets (Table S2). For this analysis, the genetic information was not used, because Phenomizer is not able to use genetic information. The percentage of cases in which the true diagnosis was placed at a given rank is shown on the Y axis. The X axis shows the ranks or rank groups. LIRICAL placed a total of 43.7% of cases in the top 3 ranks, and Phenomizer placed a total of 35.3% of cases in the top 3 ranks.

(a)

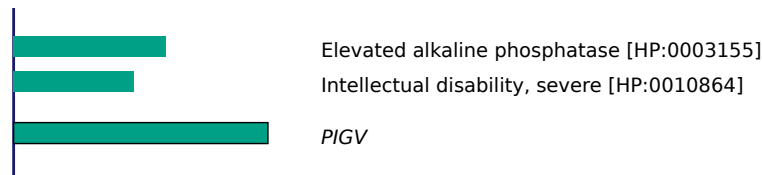

-4 -3 -2 -1 0 1 2 3 4  
(b)

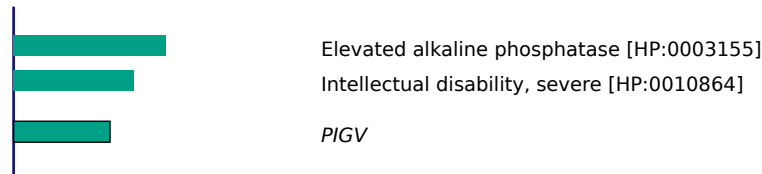

-4 -3 -2 -1 0 1 2 3 4

**Figure S5. Ranking of an autosomal recessive disease with one pathogenic allele.** Current exome and genome technologies can miss variants in highly GC-rich exons or can fail to detect structural variants. This may lead to only one of the expected two pathogenic alleles being identified for an autosomal recessive candidate disease. In this example, we show a simulated case of Hyperphosphatasia with mental retardation syndrome 1 (OMIM:239300) with two typical features. LIRICAL does not apply a hard filter to such cases but instead employs a flexible genotype likelihood ratio score. (a) Simulation with two pathogenic alleles; (b) Simulation in which one of the two alleles was removed. The LR for *PIGV* is lower but still contributory and the correct diagnosis remained in rank #1. The variants are chr1:27121140C>G (NM\_001202554.1:c.615C>G, NP\_001189483.1:p.(Asn205Lys)) and chr1:27121379A>G (NM\_001202554.1:c.854A>G, NP\_001189483.1:p.(Tyr285Cys)). Chromosomal coordinates are according to hg19.

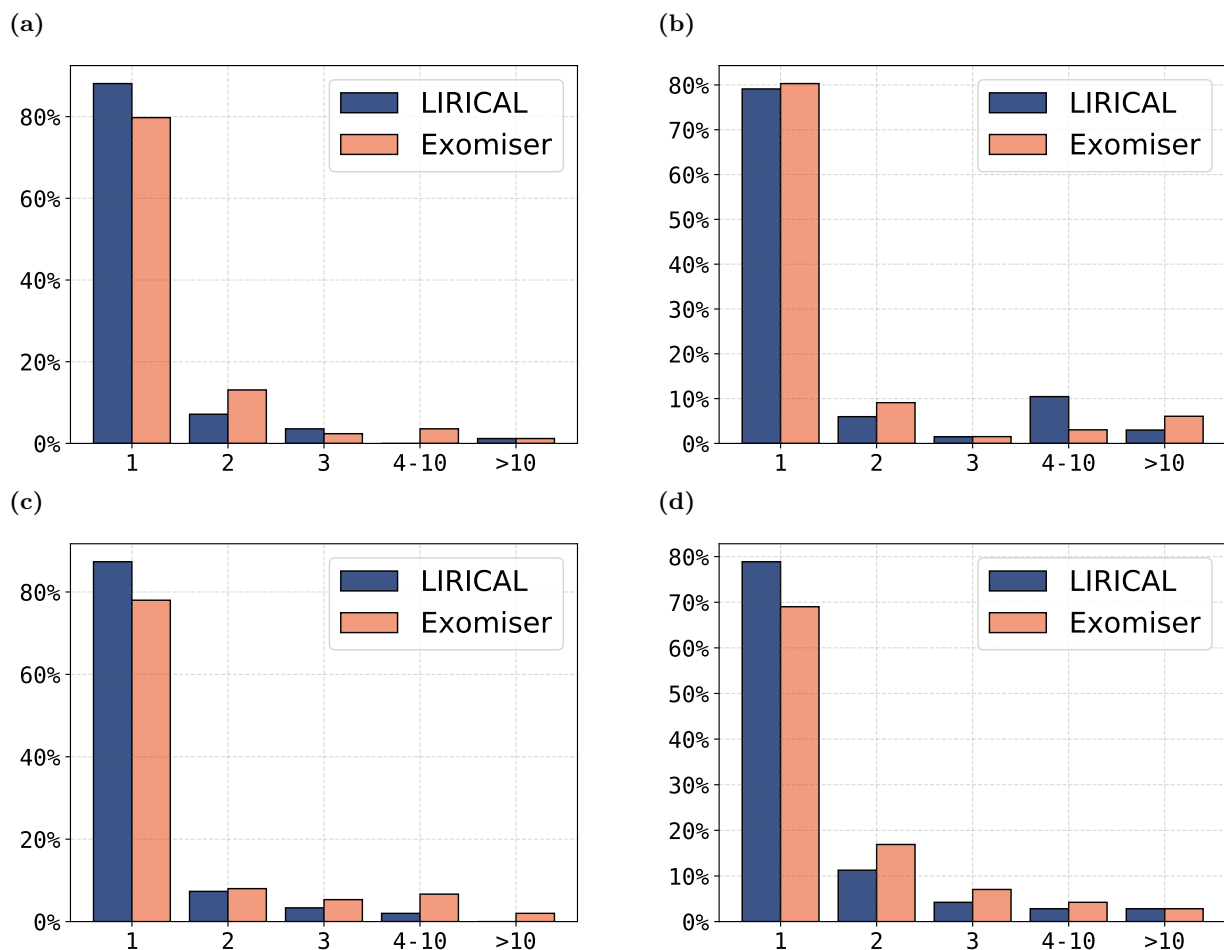

**Figure S6. Performance of LIRICAL and Exomiser according to mode of inheritance and ClinVar status.** The evaluation shown in Figure 2 of the main manuscript was repeated for subsets of the data. (a) Autosomal dominant diseases with disease-associated variant listed as pathogenic in ClinVar ( $n = 84$ ); (b) Autosomal dominant diseases without variant listed as pathogenic in ClinVar ( $n = 67$ ); (c) Autosomal recessive diseases with at least one disease-associated variant listed as pathogenic in ClinVar ( $n = 150$ ); (d) Autosomal recessive diseases without variant listed as pathogenic in ClinVar ( $n = 71$ ).



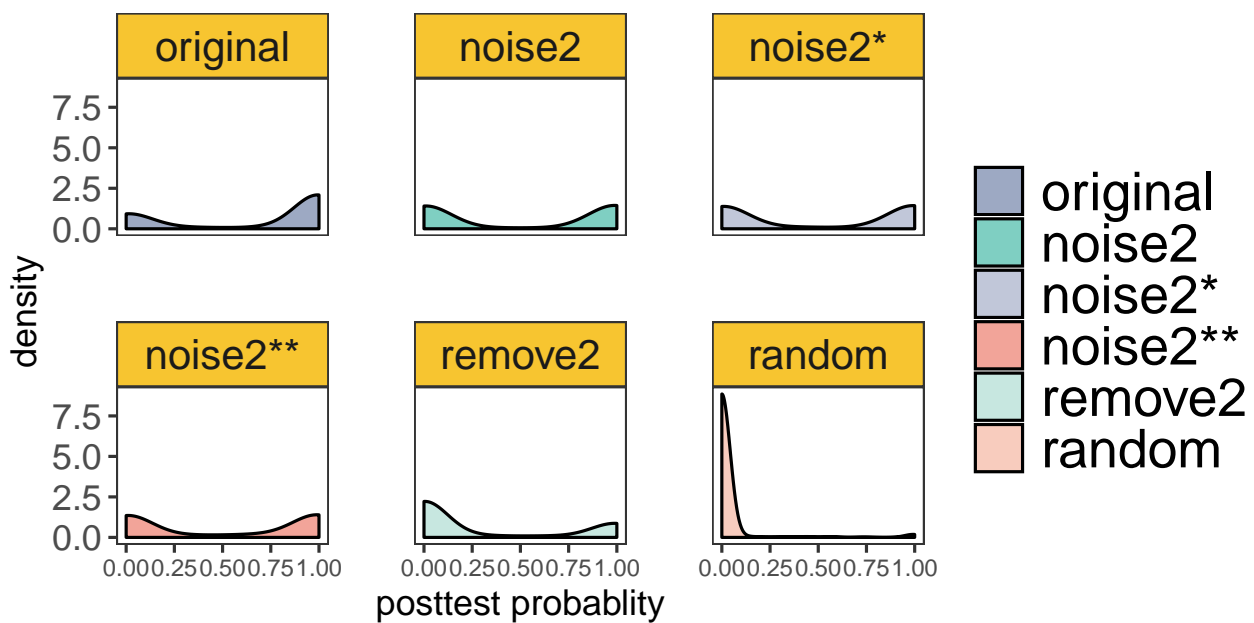

**Figure S7. LIRICAL's posttest probability estimates.** The post-test probability of the correct diagnosis was calculated for each of the 384 phenopacket case reports (Original). The mean post-test probability (pp) of the original data was 67.4%. Five procedures were applied to add noise to this data (Supplemental Table S3). Results for the original data are shown as **original**. **noise2**: two random HPO terms were added (mean pp: 50.8%); **noise2\***: two random HPO terms were added and original terms were replaced by parent terms (mean pp: 50.3%); **noise2\*\***: two random HPO terms were added and original terms were replaced by grandparent terms (mean pp:(mean pp: 50.3%); **remove2**: All pathogenic alleles were removed (mean pp: 29.4%); **random**: All HPO terms were replaced by random terms (mean pp: 2.9%).

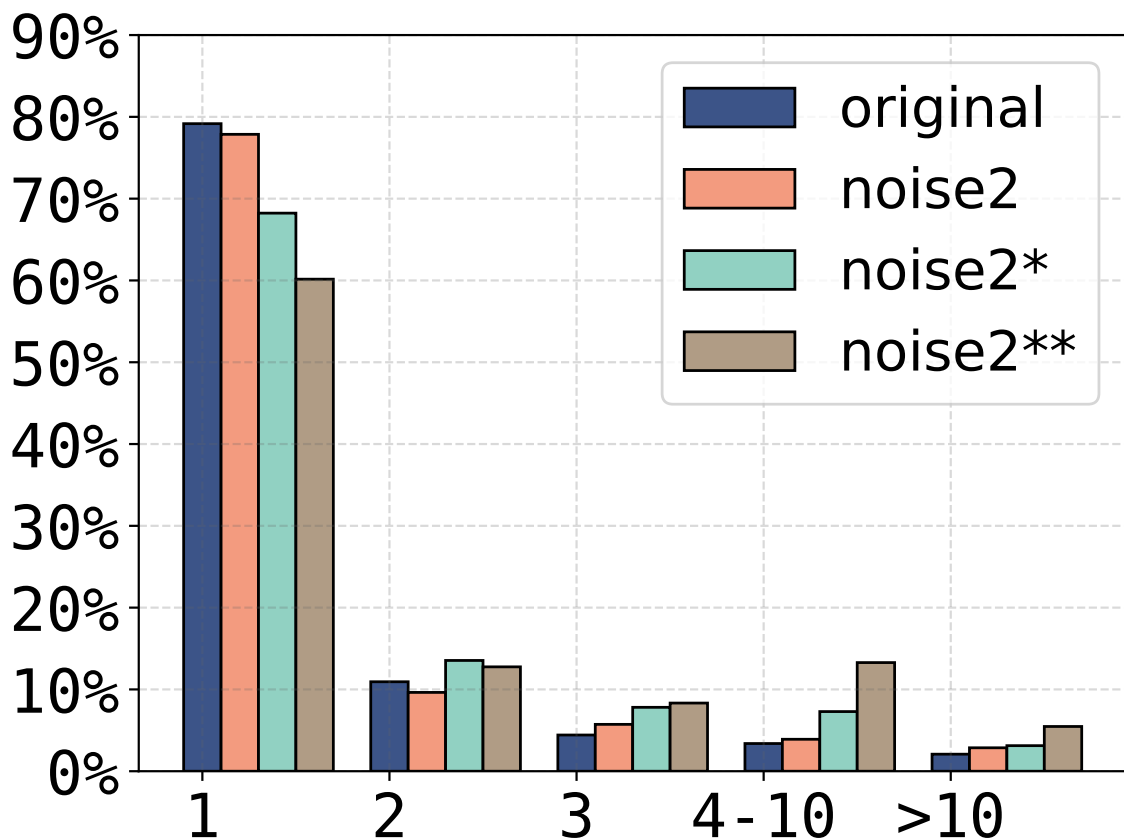

**Figure S8. LIRICAL disease ranks.** The ability of LIRICAL to predict the correct disease was assessed with 384 case reports (Table S2). This is the same simulation as presented in Fig. 2 of the main manuscript, but the rank is recorded for diseases instead of for disease genes. This is a harder prediction task because many genes are associated with multiple Mendelian diseases. Four tests were performed: **original**: unaltered data from the case reports; **noise2**: Two random (“noise”) HPO terms are added to each case; **noise2\***: Original terms are replaced by a parent term and two noise terms are added; **noise2\*\***: Original terms are replaced by a grandparent term and two noise terms are added. The X axis shows the rank assigned by LIRICAL to the correct disease gene. The Y axis shows the percentage of cases in which the given rank was achieved.

(a)

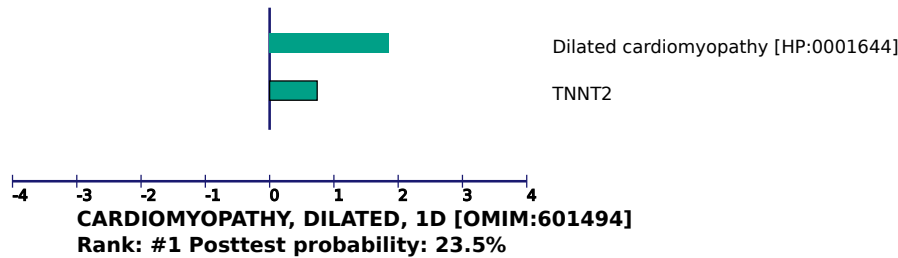

(b)

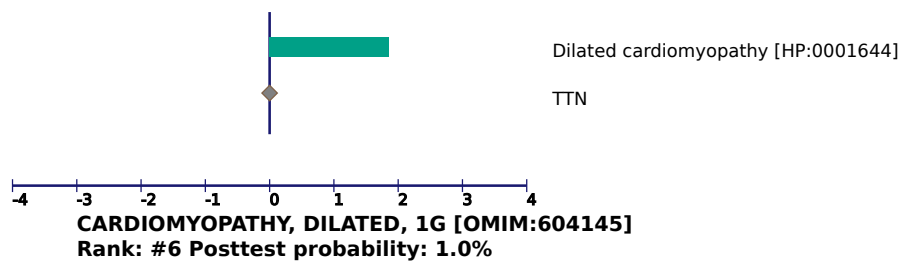

(c)

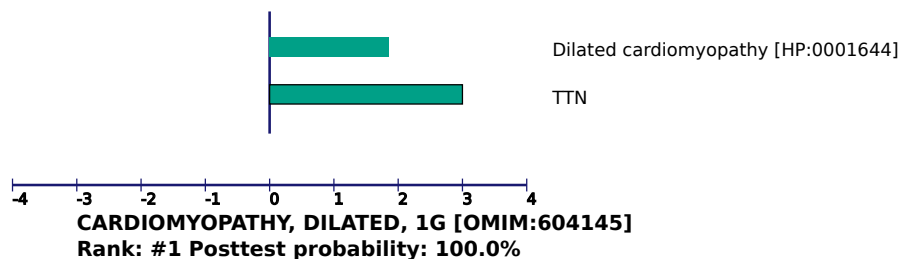

**Figure S9. LIRICAL's treatment of ClinVar pathogenic variants.** In this example, we simulate a patient with a rare (0.02% maximum population frequency) variant in *TTN*, NM\_001267550.2(*TTN*):c.18295C>T [2], who is noted to have Dilated cardiomyopathy (HP:0001644). The variant is listed as having Uncertain significance in ClinVar (VCV000263438.2). (a) The candidate placed in rank 1 is a false positive, Dilated cardiomyopathy 1D (OMIM:601494) related to a variant in the *TNNT2* gene (NM\_000364.3: c.683T>C, p.(Ile228Thr) that was present in the control VCF file. This variant is listed in ClinVar as having uncertain clinical significance (VCV000181604.2). (b) The correct candidate is placed at rank 6, Dilated cardiomyopathy 1G (OMIM:604145). The *TTN* mutation is scored with a likelihood ratio of just 2.70 in favor of OMIM:604145 because of the high background frequency of variants in this gene ( $\lambda^B = 9.4564$ ), despite the near maximal raw pathogenicity score of Exomiser (0.997). (c) In a separate simulation, the *TTN* variant NM\_001267550.2:c.2926T>C (p.Trp976Arg) was spiked into the same control VCF file. This variant is listed in ClinVar as likely pathogenic (VCV000012651.3), and for this reason is (heuristically) assigned a likelihood ratio of 1000 by LIRICAL. The candidate is now correctly ranked in first place.

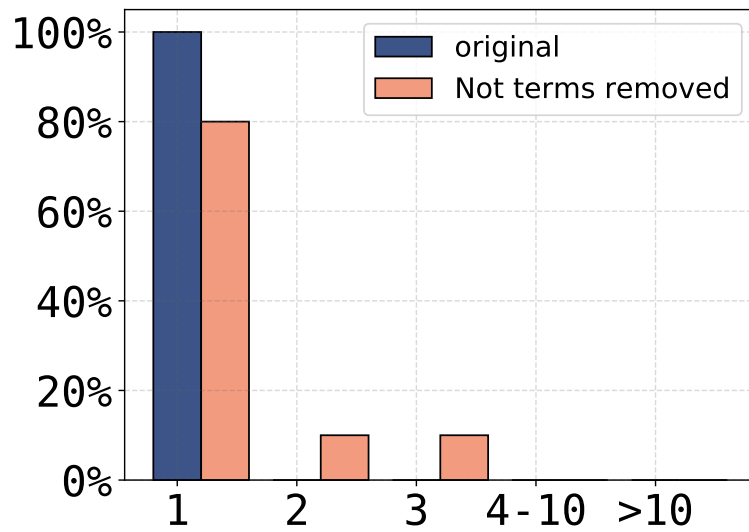

**Figure S10. Negated annotations.** LIRICAL was run with ten cases with a negated (“not”) annotation deemed important for the differential diagnosis. For instance, Loeys-Dietz syndrome 4 is annotated not to have *Ectopia lentis*. Although the overall performance was good even without the negated annotations, in two of the ten cases, including the negated annotation boosted the rank of the correct candidate disease from 2 or 3 to 1. The X axis shows the rank assigned by LIRICAL to the correct disease gene. The Y axis shows the percentage of cases in which the given rank was achieved.

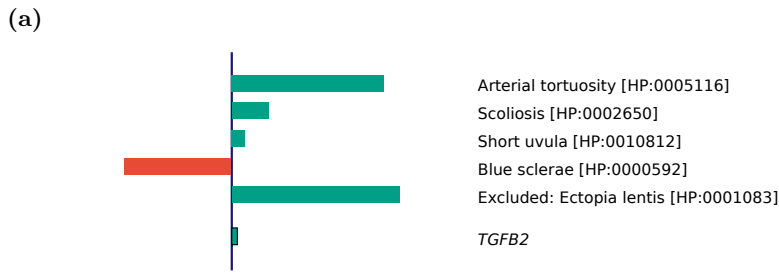

-4 -3 -2 -1 0 1 2 3 4  
**LOEYS-DIETZ SYNDROME, TYPE 4 [OMIM:614816]**  
 Rank: #1 Posttest probability: 92.4%

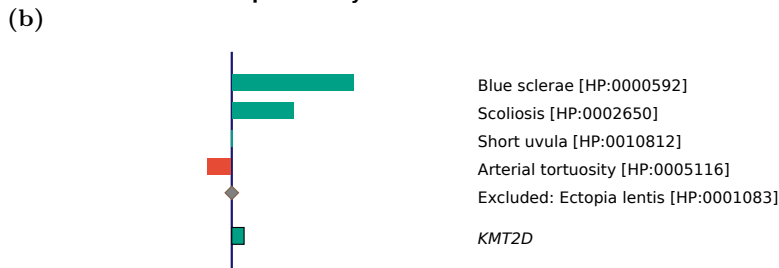

-4 -3 -2 -1 0 1 2 3 4  
**KABUKI SYNDROME 1 [OMIM:147920]**  
 Rank: #2 Posttest probability: 23.1%

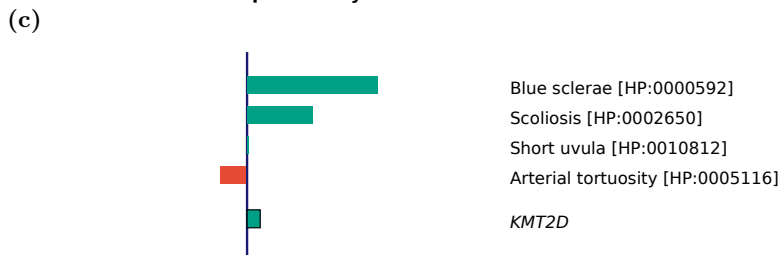

-4 -3 -2 -1 0 1 2 3 4  
**KABUKI SYNDROME 1 [OMIM:147920]**  
 Rank: #1 Posttest probability: 23.0%

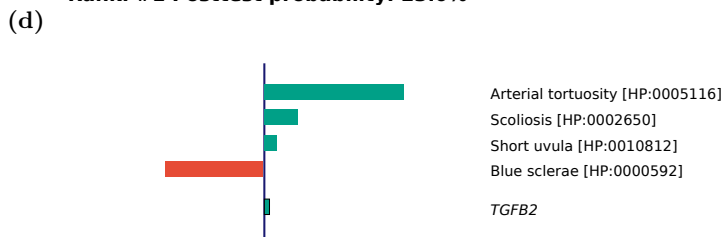

-4 -3 -2 -1 0 1 2 3 4  
**LOEYS-DIETZ SYNDROME, TYPE 4 [OMIM:614816]**  
 Rank: #2 Posttest probability: 1.2%

**Figure S11. Ranking of candidate diseases with and without excluded features.** In this example, panels (a) and (b) were run using a negated query term, *Ectopia lentis*, that had been excluded by examination of a hypothetical proband. Ranks 1 and 2 are shown. The correct diagnosis, *Loeys-Dietz syndrome 4*, has a posttest probability of 92.4%. In panels (c) and (d), the excluded term was omitted and the correct diagnosis was placed in rank 2.

(a)

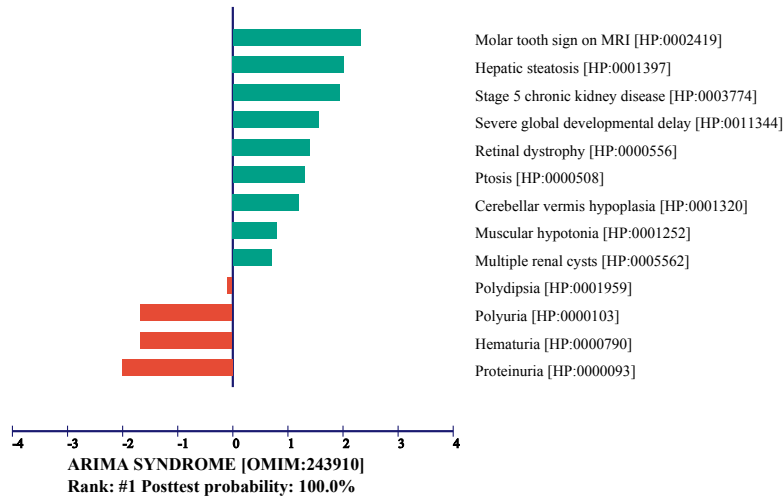

(b)

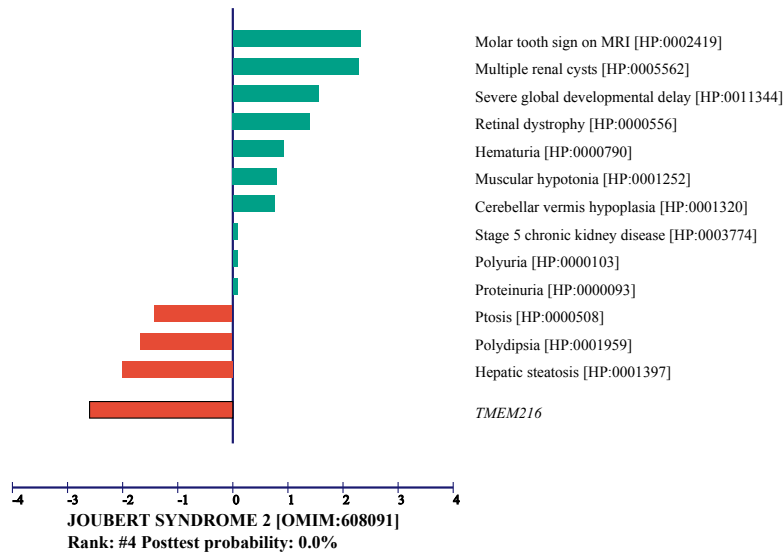

**Figure S12. Assessment of diseases based only on clinical criteria.** In this example, a case of Arima syndrome is simulated based on case 1 in a report on the clinicopathological features of the renal disease in Arima syndrome [3]. Arima syndrome shares many phenotypic features with Joubert syndrome. **(a)** In the simulated case using the control VCF file (without spiking in any pathogenic variant), Arima syndrome was correctly ranked in first place. **(b)** A type of Joubert syndrome was ranked in fourth place. No pathogenic alleles were identified in the causative gene *TMEM216*, which reduced the likelihood ratio (red bar corresponding to *TMEM216*).

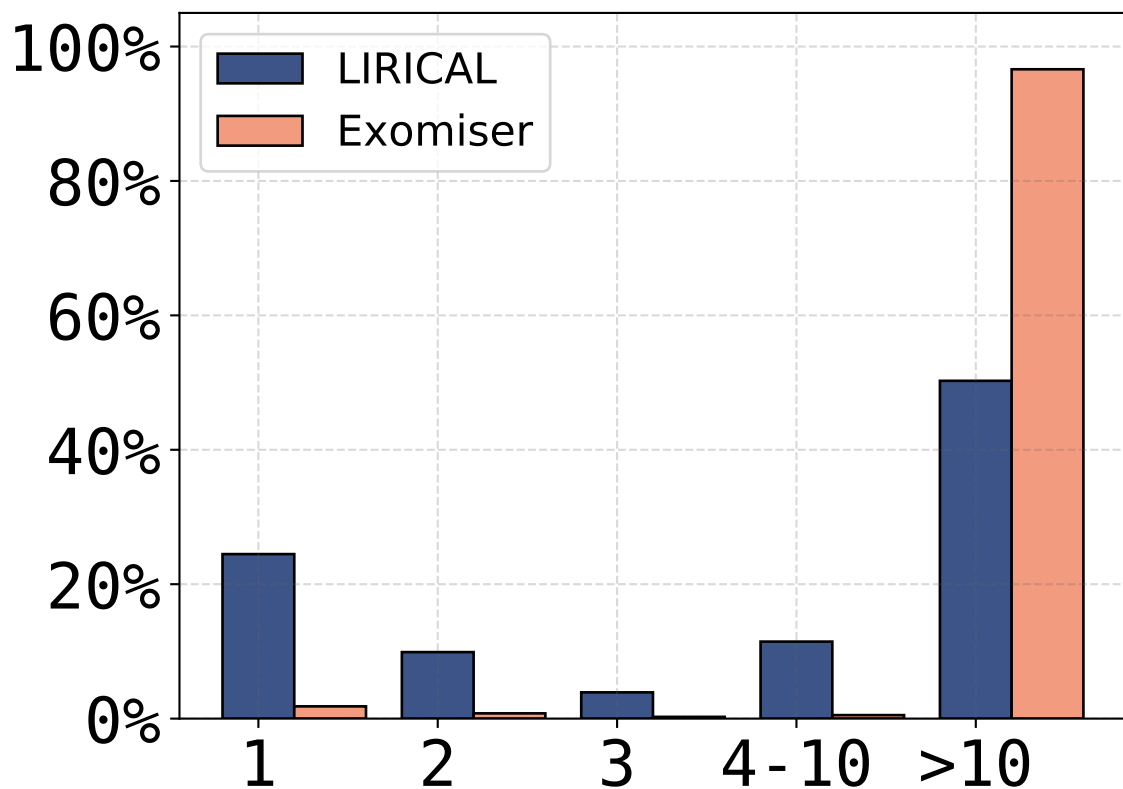

**Figure S13. Rankings with all pathogenic alleles removed.** Performance of LIRICAL (blue) and Exomiser (orange) on 384 case reports from which all pathogenic alleles have been removed from the VCF file. LIRICAL placed the correct candidate in the first ten ranks in 49.7% of cases, while Exomiser placed 4 of 384 candidates in rank 1 and failed to rank any of the other candidates. The X axis shows the rank assigned by LIRICAL or Exomiser to the correct disease gene. The Y axis shows the percentage of cases in which the given rank was achieved.

| Gene                   | Frequency | Associated disease                                                                               |
|------------------------|-----------|--------------------------------------------------------------------------------------------------|
| <i>TTN</i> (7273)      | 9.46      | CARDIOMYOPATHY, FAMILIAL HYPERTROPHIC, 9 (OMIM:613765)                                           |
| <i>HLA-DRB1</i> (3123) | 9.29      | SARCOIDOSIS, SUSCEPTIBILITY TO, 1 (OMIM:181000)                                                  |
| <i>KRT18</i> (3875)    | 7.25      | CIRRHOSIS, FAMILIAL (OMIM:215600)                                                                |
| <i>FLG</i> (2312)      | 5.98      | DERMATITIS, ATOPIC, 2 (OMIM:605803)                                                              |
| <i>NEB</i> (4703)      | 5.29      | NEMALINE MYOPATHY 2 (OMIM:256030)                                                                |
| <i>MUC5B</i> (727897)  | 4.99      | PULMONARY FIBROSIS, IDIOPATHIC (OMIM:178500)                                                     |
| <i>HLA-DQB1</i> (3119) | 4.47      | CELIAC DISEASE, SUSCEPTIBILITY TO, 1 (OMIM:212750)                                               |
| <i>SYNE2</i> (23224)   | 3.94      | EMERY-DREIFUSS MUSCULAR DYSTROPHY 5, AUTOSOMAL DOMINANT (OMIM:612999)                            |
| <i>SYN2</i> (6854)     | 3.71      | SCHIZOPHRENIA (OMIM:181500)                                                                      |
| <i>RP1L1</i> (94137)   | 3.53      | OCCULT MACULAR DYSTROPHY (OMIM:613587)                                                           |
| <i>DSPP</i> (1834)     | 3.38      | DEAFNESS, AUTOSOMAL DOMINANT 39, WITH DENTINOGENESIS IMPERFECTA 1 (OMIM:605594)                  |
| <i>FSIP2</i> (401024)  | 3.14      | SPERMATOGENIC FAILURE 34 (OMIM:618153)                                                           |
| <i>SCARF2</i> (91179)  | 3.11      | VAN DEN ENDE-GUPTA SYNDROME (OMIM:600920)                                                        |
| <i>ARMC9</i> (80210)   | 3.04      | JOUBERT SYNDROME 30 (OMIM:617622)                                                                |
| <i>DNAH11</i> (8701)   | 3.00      | CILIARY DYSKINESIA, PRIMARY, 7 (OMIM:611884)                                                     |
| <i>KMT2C</i> (58508)   | 2.96      | KLEEFSTRA SYNDROME 2 (OMIM:617768)                                                               |
| <i>HLA-DQA1</i> (3117) | 2.96      | CELIAC DISEASE, SUSCEPTIBILITY TO, 1 (OMIM:212750)                                               |
| <i>EYS</i> (346007)    | 2.87      | RETINITIS PIGMENTOSA 25 (OMIM:602772)                                                            |
| <i>HPS4</i> (89781)    | 2.73      | HERMANSKY-PUDLAK SYNDROME 4 (OMIM:614073)                                                        |
| <i>ALMS1</i> (7840)    | 2.54      | ALSTROM SYNDROME (OMIM:203800)                                                                   |
| <i>FAT2</i> (2196)     | 2.47      | SPINOCEREBELLAR ATAXIA 45 (OMIM:617769)                                                          |
| <i>PIEZO1</i> (9780)   | 2.41      | LYMPHATIC MALFORMATION 6 (OMIM:616843)                                                           |
| <i>DST</i> (667)       | 2.41      | EPIDERMOLYSIS BULLOSA SIMPLEX, AUTOSOMAL RECESSIVE 2 (OMIM:615425)                               |
| <i>ACAN</i> (176)      | 2.37      | SPONDYLOEPIMETAPHYSEAL DYSPLASIA, AGGREGAN TYPE (OMIM:612813)                                    |
| <i>HNF1A</i> (6927)    | 2.37      | DIABETES MELLITUS, INSULIN-DEPENDENT, 20 (OMIM:612520)                                           |
| <i>TNXB</i> (7148)     | 2.35      | VESICoureTERAL REFLUX 8 (OMIM:615963)                                                            |
| <i>TRIOBP</i> (11078)  | 2.33      | DEAFNESS, AUTOSOMAL RECESSIVE 28 (OMIM:609823)                                                   |
| <i>ISCU</i> (23479)    | 2.29      | MYOPATHY WITH LACTIC ACIDOSIS, HEREDITARY (OMIM:255125)                                          |
| <i>SON</i> (6651)      | 2.21      | ZTTK SYNDROME (OMIM:617140)                                                                      |
| <i>ADGRV1</i> (84059)  | 2.19      | USHER SYNDROME, TYPE IIC (OMIM:605472)                                                           |
| <i>TREH</i> (11181)    | 2.16      | TREHALASE DEFICIENCY (OMIM:612119)                                                               |
| <i>SERPINA1</i> (5265) | 2.11      | ALPHA-1-ANTITRYPSIN DEFICIENCY (OMIM:613490)                                                     |
| <i>FRRS1L</i> (23732)  | 2.02      | EPILEPTIC ENCEPHALOPATHY, EARLY INFANTILE, 37 (OMIM:616981)                                      |
| <i>FRG1</i> (2483)     | 2.01      | FACIOSCAPULOHUMERAL MUSCULAR DYSTROPHY 1 (OMIM:158900)                                           |
| <i>CTU2</i> (348180)   | 1.95      | MICROCEPHALY, FACIAL DYSMORPHISM, RENAL AGENESIS, AND AMBIGUOUS GENITALIA SYNDROME (OMIM:618142) |
| <i>KRT13</i> (3860)    | 1.79      | WHITE SPONGE NEVUS 2 (OMIM:615785)                                                               |
| <i>STXBP2</i> (6813)   | 1.79      | HEMOPHAGOCYTIC LYMPHOHISTIOCYTOSIS, FAMILIAL, 5 (OMIM:613101)                                    |
| <i>GEMIN4</i> (50628)  | 1.75      | NEURODEVELOPMENTAL DISORDER WITH MICROCEPHALY, CATARACTS, AND RENAL ABNORMALITIES (OMIM:617913)  |
| <i>DUOX2</i> (50506)   | 1.75      | THYROID DYSHORMONOGENESIS 6 (OMIM:607200)                                                        |
| <i>A2ML1</i> (144568)  | 1.75      | OTITIS MEDIA, SUSCEPTIBILITY TO (OMIM:166760)                                                    |
| <i>APOL1</i> (8542)    | 1.71      | FOCAL SEGMENTAL GLOMERULOSCLEROSIS 4, SUSCEPTIBILITY TO (OMIM:612551)                            |
| <i>MYO5B</i> (4645)    | 1.71      | DIARRHEA 2, WITH MICROVILLUS ATROPHY (OMIM:251850)                                               |
| <i>TMEM216</i> (51259) | 1.70      | JOUBERT SYNDROME 2 (OMIM:608091)                                                                 |
| <i>LTBP4</i> (8425)    | 1.69      | CUTIS LAXA, AUTOSOMAL RECESSIVE, TYPE IC (OMIM:613177)                                           |
| <i>PCLO</i> (27445)    | 1.64      | PONTOCEREBELLAR HYPOPLASIA, TYPE 3 (OMIM:608027)                                                 |
| <i>KIZ</i> (55857)     | 1.64      | RETINITIS PIGMENTOSA 69 (OMIM:615780)                                                            |
| <i>VCAN</i> (1462)     | 1.61      | WAGNER VITREORETINOPATHY (OMIM:143200)                                                           |
| <i>VPS13B</i> (157680) | 1.61      | COHEN SYNDROME (OMIM:216550)                                                                     |
| <i>RAI1</i> (10743)    | 1.60      | SMITH-MAGENIS SYNDROME (OMIM:182290)                                                             |
| <i>VWA3B</i> (200403)  | 1.60      | SPINOCEREBELLAR ATAXIA, AUTOSOMAL RECESSIVE 22 (OMIM:616948)                                     |
| <i>DHFR</i> (1719)     | 1.58      | MEGALOBlastic ANEMIA DUE TO DIHYDROFOLATE REDUCTASE DEFICIENCY (OMIM:613839)                     |

**Table S1.** The 50 Mendelian disease-associated genes with the highest sum of population frequencies of called pathogenic variants.



**Table S2.** Phenopackets analyzed in this work.

| Disease                                                                           | Gene     | Proband                   | n.<br>HPO<br>terms | Publication   |
|-----------------------------------------------------------------------------------|----------|---------------------------|--------------------|---------------|
| Neurodevelopmental Disorder With Or Without Anomalies Of The Brain, Eye, Or Heart | RERE     | Subject 9                 | 84                 | PMID:27087320 |
| Hypotonia, Infantile, With Psychomotor Retardation And Characteristic Facies 3    | TBCK     | 6-2                       | 5                  | PMID:27040691 |
| Ectodermal Dysplasia 1, Hypohidrotic, X-Linked                                    | EDA      | proband                   | 9                  | PMID:18702659 |
| Deafness, Autosomal Recessive 7                                                   | TMC1     | 935-IV:1                  | 2                  | PMID:18616530 |
| Osteogenesis Imperfecta, Type Xiv                                                 | TMEM38B  | family2-patient2          | 9                  | PMID:26911354 |
| Cutis Laxa, Autosomal Recessive, Type Iic                                         | ATP6V1E1 | Family 5 - IV:2           | 4                  | PMID:27023906 |
| Codas syndrome                                                                    | LONP1    | Proband                   | 13                 | PMID:28148925 |
| Thrombocythemia 2                                                                 | MPL      | FT2:VI:3                  | 1                  | PMID:19036112 |
| Parkinson Disease 23, Autosomal Recessive, Early Onset                            | VPS13C   | VPS13C case               | 11                 | PMID:28862745 |
| Nemaline Myopathy 4                                                               | TPM2     | 1A                        | 5                  | PMID:23378224 |
| Noonan syndrome 3                                                                 | KRAS     | Patient 2                 | 14                 | PMID:17056636 |
| Spinocerebellar Ataxia, Autosomal Recessive 20                                    | SNX14    | IV-1                      | 18                 | PMID:30473892 |
| Cleidocranial Dysplasia                                                           | RUNX2    | Family-A-III              | 19                 | PMID:31548836 |
| Epileptic Encephalopathy, Early Infantile, 28                                     | WWOX     | Patient 1                 | 18                 | PMID:27495153 |
| Congenital Disorder Of Glycosylation, Type Iip                                    | TMEM199  | F1-II2                    | 11                 | PMID:26833330 |
| Loeys-Dietz syndrome 1                                                            | TGFBR1   | patient                   | 18                 | PMID:30701076 |
| Ataxia-Pancytopenia syndrome                                                      | SAMD9L   | P5                        | 2                  | PMID:29217778 |
| Branchiooculofacial syndrome                                                      | TFAP2A   | 10-year-old girl          | 13                 | PMID:20461149 |
| Lowe Oculocerebrorenal syndrome                                                   | OCRL     | Patient 1                 | 8                  | PMID:29300302 |
| Spastic Paraplegia 76, Autosomal Recessive                                        | CAPN1    | Fam1Pat1                  | 7                  | PMID:29379883 |
| Neurodevelopmental Disorder With Or Without Anomalies Of The Brain, Eye, Or Heart | RERE     | Subject 7                 | 88                 | PMID:27087320 |
| Cerebral Creatine Deficiency syndrome 1                                           | SLC6A8   | proband                   | 7                  | PMID:30400883 |
| Epileptic Encephalopathy, Early Infantile, 14                                     | KCNT1    | Patient-1                 | 5                  | PMID:24029078 |
| Cutis Laxa, Autosomal Recessive, Type Iid                                         | ATP6V1A  | PV:1                      | 11                 | PMID:28065471 |
| Spastic Paraplegia 76, Autosomal Recessive                                        | CAPN1    | index                     | 4                  | PMID:28566166 |
| Cohen syndrome                                                                    | VPS13B   | proposita                 | 18                 | PMID:29149870 |
| Combined Oxidative Phosphorylation Deficiency 30                                  | TRMT10C  | Subject 1                 | 18                 | PMID:27132592 |
| Cutis Laxa, Autosomal Recessive, Type Iic                                         | ATP6V1E1 | PII:1                     | 13                 | PMID:28065471 |
| Hypotonia, Infantile, With Psychomotor Retardation And Characteristic Facies 3    | TBCK     | 3-1                       | 15                 | PMID:27040691 |
| Nijmegen Breakage syndrome                                                        | NBN      | 12-year-old girl          | 18                 | PMID:24044622 |
| Microcephaly 6, Primary, Autosomal Recessive                                      | CENPJ    | IV-5                      | 7                  | PMID:16900296 |
| Spondylocostal Dysostosis 1, Autosomal Recessive                                  | DLL3     | II.6                      | 6                  | PMID:15200511 |
| Microcephaly 3, Primary, Autosomal Recessive                                      | CDK5RAP2 | patient                   | 6                  | PMID:23726037 |
| Aarskog-Scott syndrome                                                            | FGD1     | II-1                      | 10                 | PMID:23211637 |
| Bardet-Biedl syndrome 4                                                           | BBS4     | 4-year-old female patient | 10                 | PMID:25533820 |
| Muscular Dystrophy, Limb-Girdle, Type 2z                                          | POGLUT1  | Patient II.1              | 13                 | PMID:27807076 |
| Neurodevelopmental Disorder With Or Without Anomalies Of The Brain, Eye, Or Heart | RERE     | Subject 7                 | 38                 | PMID:29330883 |

*Continued on next page*

Table S2 – Continued from previous page

| Disease                                                                                                         | Gene    | Proband                | n.<br>HPO<br>terms | Publication   |
|-----------------------------------------------------------------------------------------------------------------|---------|------------------------|--------------------|---------------|
| Mental Retardation, Autosomal Dominant 42                                                                       | GNB1    | proband                | 10                 | PMID:29174093 |
| Ataxia-Pancytopenia syndrome                                                                                    | SAMD9L  | UB085                  | 12                 | PMID:29146883 |
| Neurodevelopmental Disorder With Or Without Anomalies Of The Brain, Eye, Or Heart                               | RERE    | Subject 8              | 37                 | PMID:29330883 |
| Cornelia De Lange syndrome 1                                                                                    | NIPBL   | Patient 1              | 14                 | PMID:25447906 |
| Tietz syndrome                                                                                                  | MITF    | family 815             | 6                  | PMID:10851256 |
| Neurodevelopmental Disorder With Or Without Anomalies Of The Brain, Eye, Or Heart                               | RERE    | Subject 6              | 13                 | PMID:29330883 |
| Papillon-Lefevre syndrome                                                                                       | CTSC    | Case 1P1               | 6                  | PMID:23311634 |
| Neurodevelopmental Disorder With Or Without Anomalies Of The Brain, Eye, Or Heart                               | RERE    | Subject 3              | 35                 | PMID:29330883 |
| Townes-Brocks syndrome                                                                                          | SALL1   | VMFS                   | 23                 | PMID:29110636 |
| Retinitis Pigmentosa 18                                                                                         | PRPF3   | 020001-II:4            | 4                  | PMID:27886254 |
| Ataxia-Pancytopenia syndrome                                                                                    | SAMD9L  | UB081                  | 7                  | PMID:29146883 |
| Bernard-Soulier syndrome                                                                                        | GP1BA   | Patient 3              | 10                 | PMID:26044173 |
| Ehlers-Danlos syndrome, Classic Type                                                                            | COL5A1  | AN-002501              | 9                  | PMID:23587214 |
| Neurodevelopmental Disorder With Or Without Anomalies Of The Brain, Eye, Or Heart                               | RERE    | Subject 10             | 6                  | PMID:27087320 |
| Retinitis Pigmentosa With Or Without Skeletal Anomalies                                                         | CWC27   | II-4                   | 11                 | PMID:28285769 |
| Metabolic Encephalomyopathic Crises, Recurrent, With Rhabdomyolysis, Cardiac Arrhythmias, And Neurodegeneration | TANGO2  | Subject 5              | 21                 | PMID:26805781 |
| Neurodevelopmental Disorder With Or Without Anomalies Of The Brain, Eye, Or Heart                               | RERE    | Subject 8              | 93                 | PMID:27087320 |
| Hajdu-Cheney syndrome                                                                                           | NOTCH2  | proband                | 12                 | PMID:23566664 |
| Retinitis Pigmentosa 11                                                                                         | PRPF31  | IV:3                   | 5                  | PMID:30099644 |
| Intellectual Developmental Disorder With Dysmorphic Facies And Ptosis                                           | BRPF1   | Individual 11/Family F | 11                 | PMID:27939639 |
| Treacher Collins syndrome 2                                                                                     | POLR1D  | family 1:patient       | 4                  | PMID:24603435 |
| Amyloidosis, Finnish Type                                                                                       | GSN     | III:5                  | 6                  | PMID:26915616 |
| Legius syndrome                                                                                                 | SPRED1  | P62                    | 2                  | PMID:28150585 |
| Neuropathy, Hereditary Sensory And Autonomic, Type Iib                                                          | RETREG1 | F2:IV:1                | 8                  | PMID:30643655 |
| Spastic Paraplegia 76, Autosomal Recessive                                                                      | CAPN1   | Fam2Pat1               | 7                  | PMID:29379883 |
| Myhre syndrome                                                                                                  | SMAD4   | patient                | 18                 | PMID:24715504 |
| Thrombocytopenia 3                                                                                              | FYB1    | IV:5                   | 4                  | PMID:25516138 |
| Homocystinuria Due To Cystathionine Beta-Synthase Deficiency                                                    | CBS     | patient                | 4                  | PMID:8755636  |
| Albinism, Oculocutaneous, Type Iii                                                                              | TYRP1   | patient 2              | 3                  | PMID:21739261 |
| Rett syndrome, Congenital Variant                                                                               | FOXP1   | Patient 2              | 11                 | PMID:28851325 |
| Emery-Dreifuss Muscular Dystrophy 3, Autosomal Recessive                                                        | LMNA    | II3                    | 12                 | PMID:23313286 |
| Spastic Ataxia 8, Autosomal Recessive, With Hypomyelinating Leukodystrophy                                      | NKX6-2  | IV-6                   | 4                  | PMID:28575651 |
| Oliver-McFarlane syndrome                                                                                       | PNPLA6  | 18 year-old female     | 17                 | PMID:30097146 |
| Metabolic Encephalomyopathic Crises, Recurrent, With Rhabdomyolysis, Cardiac Arrhythmias, And Neurodegeneration | TANGO2  | F1:II.2                | 23                 | PMID:26805782 |

Continued on next page

Table S2 – Continued from previous page

| Disease                                                                                     | Gene     | Proband                 | n.<br>HPO<br>terms | Publication   |
|---------------------------------------------------------------------------------------------|----------|-------------------------|--------------------|---------------|
| Ehlers-Danlos syndrome, Classic-Like, 2                                                     | AEBP1    | AN-006205               | 23                 | PMID:30759870 |
| Gm1-Gangliosidosis, Type Iii                                                                | GLB1     | KT                      | 6                  | PMID:1907800  |
| Hyperoxaluria, Primary, Type Ii                                                             | GRHPR    | patient                 | 11                 | PMID:28569194 |
| Bethlem Myopathy 1                                                                          | COL6A1   | II.1                    | 21                 | PMID:30808312 |
| Immunoskeletal Dysplasia With Neurodevelopmental Abnormalities                              | EXTL3    | Patient 2               | 8                  | PMID:28148688 |
| Ehlers-Danlos syndrome, Musculocontractural Type 1                                          | CHST14   | 3-year old boy          | 16                 | PMID:30249733 |
| Stankiewicz-Isidor syndrome                                                                 | PSMD12   | Subject 2               | 30                 | PMID:28132691 |
| Marfan syndrome                                                                             | FBN1     | B15                     | 7                  | PMID:11175294 |
| Nemaline Myopathy 3                                                                         | ACTA1    | Patient 5               | 10                 | PMID:30517146 |
| Fanconi Anemia, Complementation Group C                                                     | FANCC    | proband                 | 7                  | PMID:22701786 |
| Autoimmune Polyendocrine syndrome, Type I, With Or Without Reversible metaphyseal Dysplasia | AIRE     | V-1                     | 10                 | PMID:28540407 |
| Noonan syndrome 6                                                                           | NRAS     | case 1                  | 15                 | PMID:26467218 |
| Mental Retardation, Autosomal Recessive 38                                                  | HERC2    | Pedigree 1A, VIII:8     | 9                  | PMID:23243086 |
| Marfan syndrome                                                                             | FBN1     | Patient 2               | 11                 | PMID:30101859 |
| Retinitis Pigmentosa With Or Without Skeletal Anomalies                                     | CWC27    | 3:II-1                  | 2                  | PMID:28285769 |
| Cockayne syndrome B                                                                         | ERCC6    | index                   | 18                 | PMID:30113454 |
| Neuropathy, Hereditary Sensory And Autonomic, Type Iia                                      | WNK1     | Patient                 | 13                 | PMID:16636245 |
| Hypotonia, Infantile, With Psychomotor Retardation And Characteristic Facies 3              | TBCK     | A-II-1                  | 28                 | PMID:27040692 |
| Elliptocytosis 2                                                                            | SPTA1    | proband                 | 10                 | PMID:29484404 |
| Spastic Paraplegia 76, Autosomal Recessive                                                  | CAPN1    | II-4                    | 5                  | PMID:29678961 |
| Hypotonia, Infantile, With Psychomotor Retardation And Characteristic Facies 3              | TBCK     | B-IV-6                  | 16                 | PMID:27040692 |
| Homocystinuria Due To Cystathionine Beta-Synthase Deficiency                                | CBS      | III:3                   | 12                 | PMID:26667307 |
| Ataxia-Pancytopenia syndrome                                                                | SAMD9L   | UB049                   | 7                  | PMID:29146883 |
| Waardenburg syndrome, Type 3                                                                | PAX3     | proposita               | 8                  | PMID:12949970 |
| Immunoskeletal Dysplasia With Neurodevelopmental Abnormalities                              | EXTL3    | D:IV-1                  | 23                 | PMID:28132690 |
| Osteogenesis Imperfecta, Type Xi                                                            | FKBP10   | proband                 | 9                  | PMID:29801479 |
| Retinitis Pigmentosa 27                                                                     | NRL      | II:2                    | 4                  | PMID:28106895 |
| Cutis Laxa, Autosomal Recessive, Type Ia                                                    | FBLN5    | 4-year-old Burmese girl | 12                 | PMID:24962763 |
| Rubinstein-Taybi syndrome 2                                                                 | EP300    | 11                      | 26                 | PMID:29506490 |
| Amelogenesis Imperfecta, Type Ij                                                            | ACP4     | Family 1-IV:3           | 2                  | PMID:28513613 |
| Osteogenesis Imperfecta, Type Viii                                                          | P3H1     | proband                 | 4                  | PMID:27864101 |
| Cornelia De Lange syndrome 3                                                                | SMC3     | patient 1               | 23                 | PMID:28781842 |
| 3-methylglutaconic Aciduria With Deafness, Encephalopathy, And Leigh-Likesyndrome           | SERAC1   | proband                 | 23                 | PMID:31251474 |
| Neurodevelopmental Disorder With Or Without Anomalies Of The Brain, Eye, Or Heart           | RERE     | Subject 2               | 84                 | PMID:27087320 |
| Geleophysic Dysplasia 1                                                                     | ADAMTSL2 | patient                 | 16                 | PMID:27057656 |

Continued on next page

Table S2 – Continued from previous page

| Disease                                                                                                                                         | Gene    | Proband                  | n.<br>HPO<br>terms | Publication   |
|-------------------------------------------------------------------------------------------------------------------------------------------------|---------|--------------------------|--------------------|---------------|
| Parkinson Disease 23, Autosomal Recessive, Early Onset                                                                                          | VPS13C  | Family B, II-1           | 5                  | PMID:26942284 |
| Spastic Ataxia 8, Autosomal Recessive, With Hypomyelinating Leukodystrophy                                                                      | NKX6-2  | Patient 4 II-1           | 10                 | PMID:28969374 |
| Myopathy, Distal, Tateyama Type                                                                                                                 | CAV3    | I1                       | 16                 | PMID:18930476 |
| Ataxia-Pancytopenia syndrome                                                                                                                    | SAMD9L  | III-1                    | 10                 | PMID:28202457 |
| Stankiewicz-Isidor syndrome                                                                                                                     | PSMD12  | Subject 3                | 12                 | PMID:28132691 |
| Arthrogryposis, Distal, Type 2a                                                                                                                 | MYH3    | proband                  | 13                 | PMID:28584669 |
| Polymicrogyria With Seizures                                                                                                                    | RTTN    | Patient 3                | 10                 | PMID:29883675 |
| Cutis Laxa, Autosomal Recessive, Type Iid                                                                                                       | ATP6V1A | PIV:1                    | 19                 | PMID:28065471 |
| Glycogen Storage Disease Vi                                                                                                                     | PYGL    | 2-year 5-month old child | 14                 | PMID:28984260 |
| Polyarteritis Nodosa, Childhood-Onset                                                                                                           | ADA2    | patient 1                | 13                 | PMID:28830446 |
| Bardet-Biedl syndrome 1                                                                                                                         | BBS1    | IV-5/family A            | 7                  | PMID:23559858 |
| Arthrogryposis, Distal, With Impaired Proprioception And Touch                                                                                  | PIEZO2  | Patient                  | 12                 | PMID:27974811 |
| Hypotonia, Infantile, With Psychomotor Retardation And Characteristic Facies 3                                                                  | TBCK    | 2-1                      | 12                 | PMID:27040691 |
| Severe Combined Immunodeficiency, Autosomal Recessive, T Cell-Negative,b Cell-Negative, Nk Cell-Negative, Due To Adenosine Deaminase Deficiency | ADA     | Patient                  | 6                  | PMID:1680289  |
| Hypotonia, Infantile, With Psychomotor Retardation And Characteristic Facies 3                                                                  | TBCK    | Patient 2                | 16                 | PMID:30103036 |
| Spastic Ataxia 8, Autosomal Recessive, With Hypomyelinating Leukodystrophy                                                                      | NKX6-2  | Patient 36-16DG1123      | 5                  | PMID:28940097 |
| Neurodevelopmental Disorder With Or Without Anomalies Of The Brain, Eye, Or Heart                                                               | RERE    | Subject 5                | 31                 | PMID:29330883 |
| Structural Heart Defects And Renal Anomalies syndrome                                                                                           | TMEM260 | 1-II-1                   | 23                 | PMID:28318500 |
| Cone-Rod Dystrophy 2                                                                                                                            | CRX     | IV:5                     | 4                  | PMID:30095615 |
| Hypotonia, Infantile, With Psychomotor Retardation And Characteristic Facies 3                                                                  | TBCK    | B-IV-4                   | 24                 | PMID:27040692 |
| Smith-Lemli-Opitz syndrome                                                                                                                      | DHCR7   | patient                  | 13                 | PMID:28503313 |
| Congenital Disorder Of Glycosylation, Type II                                                                                                   | ALG9    | IV:5                     | 16                 | PMID:26453364 |
| Nephrotic syndrome, Type 1                                                                                                                      | NPHS1   | patient 1                | 9                  | PMID:28392951 |
| Neurodevelopmental Disorder With Or Without Anomalies Of The Brain, Eye, Or Heart                                                               | RERE    | Subject 3                | 96                 | PMID:27087320 |
| Acromesomelic Dysplasia, Maroteaux Type                                                                                                         | NPR2    | IV-2/family-A            | 10                 | PMID:25959430 |
| Ayme-Gripp syndrome                                                                                                                             | MAF     | patient CSA108.01        | 1                  | PMID:28482824 |
| Spastic Paraplegia 76, Autosomal Recessive                                                                                                      | CAPN1   | SAL-399-073              | 7                  | PMID:27320912 |
| Geleophysic Dysplasia 2                                                                                                                         | FBN1    | Family 1, Patient 1      | 14                 | PMID:29191498 |
| Robinow syndrome, Autosomal Recessive                                                                                                           | ROR2    | Patient 1                | 20                 | PMID:24932600 |
| Parkinson Disease 23, Autosomal Recessive, Early Onset                                                                                          | VPS13C  | Family C, II-1           | 4                  | PMID:26942284 |
| Wiedemann-Steiner syndrome                                                                                                                      | KMT2A   | P1                       | 16                 | PMID:25186178 |

Continued on next page

Table S2 – Continued from previous page

| Disease                                                                           | Gene    | Proband             | n.<br>HPO<br>terms | Publication   |
|-----------------------------------------------------------------------------------|---------|---------------------|--------------------|---------------|
| Diarrhea 8, Secretory Sodium, Congenital                                          | SLC9A3  | Patient 9           | 9                  | PMID:26358773 |
| Spastic Paraplegia 76, Autosomal Recessive                                        | CAPN1   | Index               | 7                  | PMID:28321562 |
| Retinitis Pigmentosa With Or Without Skeletal Anomalies                           | CWC27   | 4:II-3              | 14                 | PMID:28285769 |
| Spastic Paraplegia 7, Autosomal Recessive                                         | SPG7    | II-3                | 13                 | PMID:17646629 |
| Hyaline Fibromatosis syndrome                                                     | ANTXR2  | II-3                | 13                 | PMID:30050362 |
| Cleidocranial Dysplasia                                                           | RUNX2   | Family-B-II1        | 19                 | PMID:31548836 |
| Heterotaxy, Visceral, 1, X-Linked                                                 | ZIC3    | III-1               | 12                 | PMID:9354794  |
| Autoimmune Lymphoproliferative syndrome                                           | FASLG   | patient             | 14                 | PMID:22857792 |
| Immunoskeletal Dysplasia With Neurodevelopmental Abnormalities                    | EXTL3   | E:II-1              | 20                 | PMID:28132690 |
| Muenke syndrome                                                                   | FGFR3   | Proband 27          | 5                  | PMID:26740388 |
| Congenital Disorder Of Glycosylation, Type Iip                                    | TMEM199 | Patient 1           | 7                  | PMID:29321044 |
| Marfan syndrome                                                                   | FBN1    | Patient 1           | 4                  | PMID:30101859 |
| Mental Retardation, Autosomal Dominant 7                                          | DYRK1A  | Patient 2           | 19                 | PMID:26922654 |
| Immunoskeletal Dysplasia With Neurodevelopmental Abnormalities                    | EXTL3   | Patient 1           | 50                 | PMID:28331220 |
| Van Den Ende-Gupta syndrome                                                       | SCARF2  | proband             | 17                 | PMID:29378527 |
| Bartter syndrome, Type 4a                                                         | BSND    | family-A-III3       | 9                  | PMID:18776122 |
| Loeys-Dietz syndrome 3                                                            | SMAD3   | 54-year old woman   | 2                  | PMID:28286188 |
| Holoprosencephaly 5                                                               | ZIC2    | proband             | 3                  | PMID:30855487 |
| Epidermolysis Bullosa, Junctional, Herlitz Type                                   | LAMC2   | patient             | 5                  | PMID:24533970 |
| Neurodevelopmental Disorder With Or Without Anomalies Of The Brain, Eye, Or Heart | RERE    | Subject 6           | 78                 | PMID:27087320 |
| Apert syndrome                                                                    | FGFR2   | Patient 1           | 14                 | PMID:23546041 |
| Stankiewicz-Isidor syndrome                                                       | PSMD12  | Subject 4           | 21                 | PMID:28132691 |
| Myasthenic syndrome, Congenital, 8                                                | AGRN    | Patient 3/Kinship 2 | 15                 | PMID:24951643 |
| Donohue syndrome                                                                  | INSR    | ISR1                | 14                 | PMID:24498630 |
| Cornelia De Lange syndrome 1                                                      | NIPBL   | Patient 2           | 10                 | PMID:25447906 |
| Microcephaly 5, Primary, Autosomal Recessive                                      | ASPM    | patient             | 10                 | PMID:29644084 |
| Hypothyroidism, Thyroidal Or Athyroidal, With Spiky Hair And Cleftpalate          | FOXE1   | patient             | 7                  | PMID:24219130 |
| Fanconi Anemia, Complementation Group I                                           | FANCI   | NCI-309-1           | 9                  | PMID:26590883 |
| Hypotonia, Infantile, With Psychomotor Retardation And Characteristic Facies 3    | TBCK    | 1-1                 | 20                 | PMID:27040691 |
| Camurati-Engelmann Disease                                                        | TGFB1   | patient             | 13                 | PMID:30034812 |
| Bernard-Soulier syndrome                                                          | GP1BA   | 73 year old male    | 5                  | PMID:9233564  |
| Immunoskeletal Dysplasia With Neurodevelopmental Abnormalities                    | EXTL3   | AII-1               | 14                 | PMID:28132690 |
| Galloway-Mowat syndrome 4                                                         | TP53RK  | II-1                | 10                 | PMID:30053862 |
| Leukocyte Adhesion Deficiency, Type I                                             | ITGB2   | P1                  | 4                  | PMID:26497373 |
| Spastic Paraplegia 76, Autosomal Recessive                                        | CAPN1   | Family B-IV:1       | 7                  | PMID:27153400 |
| Ataxia-Pancytopenia syndrome                                                      | SAMD9L  | II-4                | 13                 | PMID:28202457 |
| Hypotonia, Infantile, With Psychomotor Retardation And Characteristic Facies 3    | TBCK    | 8-1                 | 14                 | PMID:27040691 |
| Trichothiodystrophy 3, Photosensitive                                             | GTF2H5  | male infant         | 27                 | PMID:30359777 |

Continued on next page

Table S2 – Continued from previous page

| Disease                                                                                                                    | Gene    | Proband            | n.<br>HPO<br>terms | Publication   |
|----------------------------------------------------------------------------------------------------------------------------|---------|--------------------|--------------------|---------------|
| Deafness, Autosomal Recessive 15                                                                                           | GIPC3   | Ahv-14:23          | 1                  | PMID:29605370 |
| Galactosemia                                                                                                               | GALT    | FKT118             | 7                  | PMID:25681079 |
| Vici syndrome                                                                                                              | EPG5    | 18-month<br>son    | 15                 | PMID:29983806 |
| Immunoskeletal Dysplasia With Neurodevelopmental Abnormalities                                                             | EXTL3   | B:II-2             | 28                 | PMID:28132690 |
| Sick Sinus syndrome 2, Autosomal Dominant                                                                                  | HCN4    | family<br>A/II:1   | 3                  | PMID:25145518 |
| Charcot-Marie-Tooth Disease, Demyelinating, Type 1c                                                                        | LITAF   | Proband            | 14                 | PMID:19541485 |
| Chudley-Mccullough syndrome                                                                                                | GPSM2   | case 1             | 13                 | PMID:27180139 |
| Schinzel-Giedion Midface Retraction syndrome                                                                               | SETBP1  | proposita          | 26                 | PMID:29333303 |
| Orofaciodigital syndrome V                                                                                                 | DDX59   | Patient 1          | 11                 | PMID:29127725 |
| Ventricular Tachycardia, Catecholaminergic Polymorphic, 1, With Orwithout Atrial Dysfunction And/or Dilated Cardiomyopathy | RYR2    | proband            | 6                  | PMID:30296944 |
| Long Qt syndrome 15                                                                                                        | CALM2   | Case 1             | 4                  | PMID:27374306 |
| Cleidocranial Dysplasia                                                                                                    | RUNX2   | Family-D-III       | 19                 | PMID:31548836 |
| Renal Cysts And Diabetes syndrome                                                                                          | HNF1B   | patient            | 6                  | PMID:29491316 |
| Ataxia-Pancytopenia syndrome                                                                                               | SAMD9L  | II-4               | 6                  | PMID:27259050 |
| Acromicric Dysplasia                                                                                                       | FBN1    | patient            | 17                 | PMID:27834076 |
| Neurodevelopmental Disorder With Or Without Anomalies Of The Brain, Eye, Or Heart                                          | RERE    | Subject 2          | 22                 | PMID:29330883 |
| Hypotonia, Infantile, With Psychomotor Retardation And Characteristic Facies 3                                             | TBCK    | II-4               | 16                 | PMID:27275012 |
| Intellectual Developmental Disorder With Dysmorphic Facies, Seizures, And Distal Limb Anomalies                            | OTUD6B  | proband            | 14                 | PMID:30364145 |
| Spastic Ataxia 8, Autosomal Recessive, With Hypomyelinating Leukodystrophy                                                 | NKX6-2  | Patient 3 II-3     | 9                  | PMID:28969374 |
| Fibrodysplasia Ossificans Progressiva                                                                                      | ACVR1   | patient            | 10                 | PMID:29482508 |
| Neurodegeneration With Brain Iron Accumulation 1                                                                           | PANK2   | Family I patient I | 7                  | PMID:28821231 |
| Al Kaissi syndrome                                                                                                         | CDK10   | F1-II:1            | 20                 | PMID:28886341 |
| Neurodevelopmental Disorder With Or Without Anomalies Of The Brain, Eye, Or Heart                                          | RERE    | Subject 5          | 92                 | PMID:27087320 |
| Hypotrichosis, Congenital, With Juvenile Macular Dystrophy                                                                 | CDH3    | Patient            | 14                 | PMID:28061825 |
| Epileptic Encephalopathy, Early Infantile, 4                                                                               | STXBP1  | P1                 | 6                  | PMID:29896790 |
| Myopathy, Centronuclear, 1                                                                                                 | DNM2    | Patient 1          | 12                 | PMID:24465259 |
| Hypotonia, Infantile, With Psychomotor Retardation And Characteristic Facies 3                                             | TBCK    | C-II-1             | 26                 | PMID:27040692 |
| Apert syndrome                                                                                                             | FGFR2   | Patient 2          | 16                 | PMID:23546041 |
| Kufor-Rakeb syndrome                                                                                                       | ATP13A2 | Case 1             | 12                 | PMID:30746398 |
| Hypotonia, Infantile, With Psychomotor Retardation And Characteristic Facies 3                                             | TBCK    | 4-2                | 4                  | PMID:27040691 |
| Ichthyosis, Congenital, Autosomal Recessive 11                                                                             | ST14    | patient            | 7                  | PMID:18445049 |
| Alzheimer Disease 4                                                                                                        | PSEN2   | proband            | 3                  | PMID:30104866 |
| Immunoskeletal Dysplasia With Neurodevelopmental Abnormalities                                                             | EXTL3   | Patient 3          | 28                 | PMID:28148688 |
| Congenital Disorder Of Glycosylation, Type Iip                                                                             | TMEM199 | F2-II2             | 17                 | PMID:26833330 |

Continued on next page

Table S2 – Continued from previous page

| Disease                                                                                    | Gene    | Proband                              | n. HPO terms | Publication   |
|--------------------------------------------------------------------------------------------|---------|--------------------------------------|--------------|---------------|
| Hypotonia, Infantile, With Psychomotor Retardation And Characteristic Facies 3             | TBCK    | 4-1                                  | 10           | PMID:27040691 |
| Tuberous Sclerosis 2                                                                       | TSC2    | III-1                                | 4            | PMID:8825048  |
| Osteogenesis Imperfecta, Type Ix                                                           | PPIB    | second fetus                         | 5            | PMID:28242392 |
| Spastic Paraplegia 76, Autosomal Recessive                                                 | CAPN1   | Tun66275                             | 3            | PMID:27320912 |
| Chitayat syndrome                                                                          | ERF     | proband                              | 17           | PMID:30569521 |
| Charge syndrome                                                                            | CHD7    | Patient A<br>III-2                   | 14           | PMID:17661815 |
| Cholestasis, Progressive Familial Intrahepatic, 4                                          | TJP2    | proband                              | 17           | PMID:30658709 |
| Congenital Disorder Of Glycosylation, Type Iip                                             | TMEM199 | Patient 3                            | 6            | PMID:29321044 |
| Osteogenesis Imperfecta, Type Xii                                                          | SP7     | II:5                                 | 16           | PMID:29382611 |
| Ectodermal Dysplasia 9, Hair/nail Type                                                     | HOXC13  | IV-1                                 | 7            | PMID:28403827 |
| Diamond-Blackfan Anemia 1                                                                  | RPS19   | patient                              | 5            | PMID:27732904 |
| Spinal Muscular Atrophy With Progressive Myoclonic Epilepsy                                | ASAH1   | patient                              | 13           | PMID:31213928 |
| Cutis Laxa, Autosomal Recessive, Type Iib                                                  | PYCR1   | Patient 4                            | 16           | PMID:21487760 |
| Intellectual Developmental Disorder With Dysmorphic Facies And Behavioral Abnormalities    | FBXO11  | Individual 1                         | 26           | PMID:30057029 |
| Nemaline Myopathy 1                                                                        | TPM3    | II.2                                 | 20           | PMID:24239060 |
| Skraban-Deardorff syndrome                                                                 | WDR26   | Individual 1,<br>PPMD01P,<br>GEA055P | 53           | PMID:28686853 |
| Stankiewicz-Isidor syndrome                                                                | PSMD12  | Subject 1                            | 34           | PMID:28132691 |
| Myasthenic syndrome, Congenital, 9, Associated With Acetylcholinereceptor Deficiency       | MUSK    | patient                              | 17           | PMID:23326516 |
| Neurodevelopmental Disorder With Progressive Microcephaly, Spasticity, And Brain Anomalies | PLAA    | Family<br>A-IV:6                     | 22           | PMID:28413018 |
| Peutz-Jeghers syndrome                                                                     | STK11   | 20-year-old<br>woman                 | 3            | PMID:15200509 |
| Structural Heart Defects And Renal Anomalies syndrome                                      | TMEM260 | 2-II-4                               | 19           | PMID:28318500 |
| Spherocytosis, Type 4                                                                      | SLC4A1  | c.1432-2A <sub>Δ</sub> T             | 3            | PMID:23255290 |
| Spastic Ataxia 8, Autosomal Recessive, With Hypomyelinating Leukodystrophy                 | NKX6-2  | III-1                                | 19           | PMID:28575651 |
| Multiple Endocrine Neoplasia, Type I                                                       | MEN1    | III-3                                | 15           | PMID:26239674 |
| Hyper-Ige Recurrent Infection syndrome, Autosomal Dominant                                 | STAT3   | 12 year old<br>girl                  | 12           | PMID:20149460 |
| Stickler syndrome, Type Ii                                                                 | COL11A1 | proband                              | 9            | PMID:28971234 |
| Congenital Disorder Of Glycosylation, Type Iip                                             | TMEM199 | Patient 2                            | 7            | PMID:29321044 |
| Spastic Paraplegia 45, Autosomal Recessive                                                 | NT5C2   | II.3                                 | 13           | PMID:28327087 |
| Werner syndrome                                                                            | WRN     | 48-year-old<br>male                  | 18           | PMID:30891318 |
| Alagille syndrome 1                                                                        | JAG1    | Proband                              | 18           | PMID:30046498 |
| Corneal Dystrophy, Fuchs Endothelial, 4                                                    | SLC4A11 | Patient 1                            | 2            | PMID:25007886 |
| Parkinson Disease 23, Autosomal Recessive, Early Onset                                     | VPS13C  | Family A, V-<br>2                    | 18           | PMID:26942284 |
| Congenital Disorder Of Glycosylation, Type Iip                                             | TMEM199 | F3-III1                              | 12           | PMID:26833330 |
| Epidermolysis Bullosa, Junctional, Herlitz Type                                            | LAMA3   | Proband                              | 2            | PMID:20881434 |
| Mucopolipidosis Ii Alpha/beta                                                              | GNPTAB  | proband                              | 14           | PMID:30208878 |
| Combined Oxidative Phosphorylation Deficiency 30                                           | TRMT10C | Subject 2                            | 15           | PMID:27132592 |

Continued on next page

Table S2 – Continued from previous page

| Disease                                                                                    | Gene     | Proband              | n.<br>HPO<br>terms | Publication   |
|--------------------------------------------------------------------------------------------|----------|----------------------|--------------------|---------------|
| Stickler syndrome, Type I                                                                  | COL2A1   | proband              | 19                 | PMID:28841907 |
| Myotonia Congenita, Autosomal Dominant                                                     | CLCN1    | man                  | 7                  | PMID:30243293 |
| Spondyloepimetaphyseal Dysplasia With Joint Laxity, Type 1, With Orwithout Fractures       | B3GALT6  | P7/F6                | 29                 | PMID:23664117 |
| Hypotonia, Infantile, With Psychomotor Retardation And Characteristic Facies 3             | TBCK     | 6-1                  | 13                 | PMID:27040691 |
| Tuberous Sclerosis 1                                                                       | TSC1     | II:3/Family 2        | 7                  | PMID:18830229 |
| Weill-Marchesani syndrome 1                                                                | ADAMTS10 | 18-year-old woman    | 9                  | PMID:25469541 |
| Megalocornea                                                                               | CHRD1    | III-1                | 4                  | PMID:24073597 |
| Hyperuricemic Nephropathy, Familial Juvenile, 1                                            | UMOD     | proband              | 6                  | PMID:15673476 |
| Cutis Laxa, Autosomal Recessive, Type Iid                                                  | ATP6V1A  | PIII:1               | 14                 | PMID:28065471 |
| Spastic Ataxia 8, Autosomal Recessive, With Hypomyelinating Leukodystrophy                 | NKX6-2   | F6,II-2              | 24                 | PMID:29388673 |
| Tuberous Sclerosis 1                                                                       | TSC1     | patient 6            | 7                  | PMID:29196670 |
| Retinitis Pigmentosa 78                                                                    | ARHGEF18 | Individual 1         | 8                  | PMID:28132693 |
| Amelogenesis Imperfecta, Type Ia                                                           | LAMB3    | proband              | 2                  | PMID:27220909 |
| Bardet-Biedl syndrome 5                                                                    | BBS5     | II:2                 | 6                  | PMID:30850397 |
| Bleeding Disorder, Platelet-Type, 17                                                       | GFI1B    | II:6                 | 5                  | PMID:30655368 |
| Nemaline Myopathy 7                                                                        | CFL2     | Patient 1            | 12                 | PMID:22560515 |
| Neurodevelopmental Disorder With Progressive Microcephaly, Spasticity, And Brain Anomalies | PLAA     | A-VI3                | 17                 | PMID:28007986 |
| Bardet-Biedl syndrome 2                                                                    | BBS2     | II:2                 | 9                  | PMID:26078953 |
| Neurofibromatosis, Type I                                                                  | NF1      | 0548                 | 8                  | PMID:9101303  |
| Gapo syndrome                                                                              | ANTXR1   | 14 year old brother  | 11                 | PMID:27587992 |
| Charcot-Marie-Tooth Disease, Axonal, Type 2a2                                              | MFN2     | patient              | 11                 | PMID:26956144 |
| Platelet Disorder, Familial, With Associated Myeloid Malignancy                            | RUNX1    | Pedigree I, V:2      | 3                  | PMID:28181366 |
| Trichohepatoenteric syndrome 1                                                             | TTC37    | index                | 17                 | PMID:28292286 |
| Hypotonia, Infantile, With Psychomotor Retardation And Characteristic Facies 3             | TBCK     | Patient 1            | 30                 | PMID:30103036 |
| Glutaric Acidemia I                                                                        | GCDH     | Patient 5            | 5                  | PMID:27672653 |
| Choreoacanthocytosis                                                                       | VPS13A   | Patient-2            | 9                  | PMID:28446873 |
| Ataxia-Pancytopenia syndrome                                                               | SAMD9L   | P7                   | 2                  | PMID:29217778 |
| Albinism, Oculocutaneous, Type Ii                                                          | OCA2     | B                    | 4                  | PMID:29050284 |
| Cockayne syndrome A                                                                        | ERCC8    | Patient A            | 7                  | PMID:30200888 |
| Pseudoachondroplasia                                                                       | COMP     | patient              | 17                 | PMID:23562786 |
| Galactosialidosis                                                                          | CTSA     | BAB3767              | 13                 | PMID:24769197 |
| Neurodevelopmental Disorder With Progressive Microcephaly, Spasticity, And Brain Anomalies | PLAA     | Family D-Case VIII-1 | 14                 | PMID:28413018 |
| Cardiomyopathy, Dilated, 1g                                                                | TTN      | JK109                | 4                  | PMID:11846417 |
| Joubert syndrome 30                                                                        | ARMC9    | UW132-3              | 5                  | PMID:28625504 |
| Dyskeratosis Congenita, Autosomal Dominant 3                                               | TINF2    | proband              | 12                 | PMID:29742735 |
| Temtamy Preaxial Brachydactyly syndrome                                                    | CHSY1    | IV-1                 | 16                 | PMID:24269551 |
| Krabbe Disease                                                                             | GALC     | child                | 6                  | PMID:26567009 |
| Neurodevelopmental Disorder With Or Without Anomalies Of The Brain, Eye, Or Heart          | RERE     | Subject 4            | 16                 | PMID:29330883 |
| Spastic Paraplegia 76, Autosomal Recessive                                                 | CAPN1    | SAL-584-005          | 4                  | PMID:27320912 |

Continued on next page



Table S2 – Continued from previous page

| Disease                                                                                                         | Gene     | Proband              | n. HPO terms | Publication   |
|-----------------------------------------------------------------------------------------------------------------|----------|----------------------|--------------|---------------|
| Ataxia, Early-Onset, With Oculomotor Apraxia And Hypoalbuminemia                                                | APTXX    | V-3                  | 4            | PMID:28652255 |
| Retinitis Pigmentosa 78                                                                                         | ARHGEF18 | Individual 2         | 8            | PMID:28132693 |
| Hypochondroplasia                                                                                               | FGFR3    | VI-5                 | 9            | PMID:30681580 |
| Hypotonia, Infantile, With Psychomotor Retardation And Characteristic Facies 3                                  | TBCK     | 5-1                  | 18           | PMID:27040691 |
| Immunoskeletal Dysplasia With Neurodevelopmental Abnormalities                                                  | EXTL3    | BII-1                | 26           | PMID:28132690 |
| Spastic Paraplegia 76, Autosomal Recessive                                                                      | CAPN1    | Family A-V:2         | 8            | PMID:27153400 |
| Neurodevelopmental Disorder With Or Without Anomalies Of The Brain, Eye, Or Heart                               | RERE     | Subject 1            | 88           | PMID:27087320 |
| Larsen syndrome                                                                                                 | FLNB     | patient              | 12           | PMID:18322662 |
| Muckle-Wells syndrome                                                                                           | NLRP3    | proband              | 9            | PMID:27435956 |
| Leukocyte Adhesion Deficiency, Type Iii                                                                         | FERMT3   | index                | 4            | PMID:31068971 |
| Cardiofaciocutaneous syndrome 1                                                                                 | BRAF     | CFC16                | 16           | PMID:16474404 |
| Ataxia-Pancytopenia syndrome                                                                                    | SAMD9L   | UB612                | 3            | PMID:29146883 |
| Immunoskeletal Dysplasia With Neurodevelopmental Abnormalities                                                  | EXTL3    | Patient 1            | 10           | PMID:28148688 |
| Metabolic Encephalomyopathic Crises, Recurrent, With Rhabdomyolysis, Cardiac Arrhythmias, And Neurodegeneration | TANGO2   | Subject 6            | 17           | PMID:26805781 |
| Boucher-Neuhauser syndrome                                                                                      | PNPLA6   | II.2                 | 8            | PMID:29749493 |
| Nail-Patella syndrome                                                                                           | LMX1B    | index                | 6            | PMID:30881852 |
| Neurodegeneration With Brain Iron Accumulation 2b                                                               | PLA2G6   | family II patient II | 8            | PMID:28821231 |
| Osteogenesis Imperfecta, Type Xv                                                                                | WNT1     | proband              | 11           | PMID:30012084 |
| Spastic Paraplegia 10, Autosomal Dominant                                                                       | KIF5A    | proband              | 12           | PMID:30057544 |
| Palmoplantar Keratoderma, Epidermolytic                                                                         | KRT9     | III:4                | 3            | PMID:18477167 |
| Cerebral Dysgenesis, Neuropathy, Ichthyosis, And Palmoplantar Keratodermasyndrome                               | SNAP29   | The patient          | 19           | PMID:29051910 |
| Metabolic Encephalomyopathic Crises, Recurrent, With Rhabdomyolysis, Cardiac Arrhythmias, And Neurodegeneration | TANGO2   | Subject 1            | 20           | PMID:26805781 |
| Spastic Ataxia 8, Autosomal Recessive, With Hypomyelinating Leukodystrophy                                      | NKX6-2   | Patient 1 II-1       | 13           | PMID:28969374 |
| Hyperekplexia, Hereditary 1                                                                                     | GLRA1    | proband              | 5            | PMID:24969041 |
| Rett syndrome, Congenital Variant                                                                               | FOXG1    | Patient 4            | 9            | PMID:28851325 |
| Loeys-Dietz syndrome 4                                                                                          | TGFB2    | proposita            | 15           | PMID:25163805 |
| Smith-Magenis syndrome                                                                                          | RAI1     | SMS324               | 25           | PMID:20932317 |
| Metabolic Encephalomyopathic Crises, Recurrent, With Rhabdomyolysis, Cardiac Arrhythmias, And Neurodegeneration | TANGO2   | Subject 4            | 16           | PMID:26805781 |
| Parkinson Disease 15, Autosomal Recessive Early-Onset                                                           | FBXO7    | ANK-07               | 7            | PMID:25085748 |
| Alpha-Thalassemia/mental Retardation syndrome, X-Linked                                                         | ATRX     | Proband              | 9            | PMID:28371217 |
| Rett syndrome, Congenital Variant                                                                               | FOXG1    | Patient 1            | 12           | PMID:28851325 |
| Smith-Kingsmore syndrome                                                                                        | MTOR     | index                | 9            | PMID:27753196 |
| Trichorhinophalangeal syndrome, Type I                                                                          | TRPS1    | girl                 | 4            | PMID:23691375 |

Continued on next page

Table S2 – Continued from previous page

| Disease                                                                                                         | Gene     | Proband                | n.<br>HPO<br>terms | Publication   |
|-----------------------------------------------------------------------------------------------------------------|----------|------------------------|--------------------|---------------|
| Holoprosencephaly 4                                                                                             | TGIF1    | male<br>proband        | 7                  | PMID:16962354 |
| Candidiasis, Familial, 2                                                                                        | CARD9    | Patient                | 8                  | PMID:26044242 |
| Megaloblastic Anemia 1                                                                                          | AMN      | III:1                  | 3                  | PMID:26040326 |
| Desmosterolosis                                                                                                 | DHCR24   | proband                | 34                 | PMID:29175559 |
| Spastic Paraplegia 76, Autosomal Recessive                                                                      | CAPN1    | Family<br>C-IV:13      | 3                  | PMID:27153400 |
| Hypotonia, Infantile, With Psychomotor Retardation And Characteristic Facies 3                                  | TBCK     | 1-2                    | 8                  | PMID:27040691 |
| Larsen syndrome                                                                                                 | FLNB     | 19                     | 12                 | PMID:16801345 |
| Toe Syndactyly, Telecanthus, And Anogenital And Renal Malformations                                             | CCNQ     | Case 2                 | 14                 | PMID:18297069 |
| Loeys-Dietz syndrome 2                                                                                          | TGFBR2   | Patient 4              | 15                 | PMID:30101859 |
| Poikiloderma With Neutropenia                                                                                   | USB1     | patient                | 7                  | PMID:27247962 |
| Neuropathy, Hereditary, With Liability To Pressure Palsies                                                      | PMP22    | Proband                | 7                  | PMID:29078790 |
| Pierpont syndrome                                                                                               | TBL1XR1  | seven year<br>old male | 29                 | PMID:28687524 |
| Hemophagocytic Lymphohistiocytosis, Familial, 2                                                                 | PRF1     | 8-year-old<br>boy      | 6                  | PMID:28468610 |
| Jervell And Lange-Nielsen syndrome 1                                                                            | KCNQ1    | family III-<br>IV-5    | 4                  | PMID:29037160 |
| Niemann-Pick Disease, Type C1                                                                                   | NPC1     | The proband            | 14                 | PMID:27900365 |
| Spherocytosis, Type 5                                                                                           | EPB42    | proposita              | 5                  | PMID:7803799  |
| Cutis Laxa, Autosomal Recessive, Type Iic                                                                       | ATP6V1E1 | PI:1                   | 13                 | PMID:28065471 |
| Multiple Endocrine Neoplasia, Type Iia                                                                          | RET      | DM patient             | 3                  | PMID:24331334 |
| Polymicrogyria, Symmetric Or Asymmetric                                                                         | TUBB2B   | proband                | 18                 | PMID:28966590 |
| Ataxia-Pancytopenia syndrome                                                                                    | SAMD9L   | IV-1                   | 5                  | PMID:27259050 |
| Metabolic Encephalomyopathic Crises, Recurrent, With Rhabdomyolysis, Cardiac Arrhythmias, And Neurodegeneration | TANGO2   | Subject 2              | 33                 | PMID:26805781 |
| Myasthenic syndrome, Congenital, 22                                                                             | PREPL    | proband                | 18                 | PMID:29483676 |
| Gaucher Disease, Perinatal Lethal                                                                               | GBA      | boy weighing<br>1690 g | 7                  | PMID:15967693 |
| Kabuki syndrome 2                                                                                               | KMT2D    | 3 month old<br>boy     | 21                 | PMID:30509212 |
| Charge syndrome                                                                                                 | CHD7     | B III-3                | 14                 | PMID:17661815 |
| Mental Retardation, Autosomal Recessive 18                                                                      | MED23    | IV.8                   | 7                  | PMID:30847200 |
| Citrullinemia, Classic                                                                                          | ASS1     | 5                      | 8                  | PMID:23099195 |
| Long Qt syndrome 14                                                                                             | CALM1    | Case 2                 | 4                  | PMID:27374306 |
| Nance-Horan syndrome                                                                                            | NHS      | III:1                  | 9                  | PMID:30642278 |
| Palmoplantar Keratoderma, Punctate Type Ia                                                                      | AAGAB    | family<br>1:proband    | 4                  | PMID:28239884 |
| Mental Retardation, Autosomal Dominant 21                                                                       | CTCF     | proband                | 28                 | PMID:28619046 |
| Ventricular Tachycardia, Catecholaminergic Polymorphic, 3                                                       | TECRL    | Patient 1              | 8                  | PMID:27861123 |
| Immunoskeletal Dysplasia With Neurodevelopmental Abnormalities                                                  | EXTL3    | C:II-1                 | 12                 | PMID:28132690 |
| Parkinson Disease 7, Autosomal Recessive Early-Onset                                                            | PARK7    | proband                | 13                 | PMID:27460976 |
| Cockayne syndrome A                                                                                             | ERCC8    | Patient C              | 5                  | PMID:30200888 |

Continued on next page

Table S2 – Continued from previous page

| Disease                                                                                          | Gene    | Proband            | n.<br>HPO<br>terms | Publication   |
|--------------------------------------------------------------------------------------------------|---------|--------------------|--------------------|---------------|
| Hypotonia, Infantile, With Psychomotor Retardation And Characteristic Facies 3                   | TBCK    | II-3               | 21                 | PMID:27275012 |
| Myopathy, Myofibrillar, 3                                                                        | MYOT    | patient            | 5                  | PMID:19458539 |
| Codas syndrome                                                                                   | LONP1   | Patient 1          | 8                  | PMID:25808063 |
| Rett syndrome, Congenital Variant                                                                | FOXG1   | Patient 3          | 9                  | PMID:28851325 |
| Retinitis Pigmentosa With Or Without Skeletal Anomalies                                          | CWC27   | 1:II-3             | 12                 | PMID:28285769 |
| Cockayne syndrome B                                                                              | ERCC6   | Patient B          | 5                  | PMID:30200888 |
| Mucopolysaccharidosis Iv                                                                         | MCOLN1  | 6 year old boy     | 8                  | PMID:28620732 |
| Chediak-Higashi syndrome                                                                         | LYST    | patient            | 14                 | PMID:28183707 |
| Marfan syndrome                                                                                  | FBN1    | Patient 3          | 4                  | PMID:30101859 |
| Congenital Disorder Of Glycosylation, Type Iih                                                   | COG8    | proband            | 27                 | PMID:30690882 |
| Pseudoachondroplasia                                                                             | COMP    | II-1               | 9                  | PMID:27330822 |
| Polymicrogyria, Bilateral Frontoparietal                                                         | ADGRG1  | Family A, II:2     | 4                  | PMID:29707406 |
| Dyggve-Melchior-Clausen Disease                                                                  | DYM     | Patient 2          | 7                  | PMID:24300288 |
| Arthrogyposis, Distal, Type 9                                                                    | FBN2    | IV:7               | 6                  | PMID:30147916 |
| Neurodevelopmental Disorder With Or Without Anomalies Of The Brain, Eye, Or Heart                | RERE    | Subject 9          | 21                 | PMID:29330883 |
| Smith-Magenis syndrome                                                                           | RAI1    | SMS335             | 15                 | PMID:20932317 |
| Inclusion Body Myopathy With Early-Onset Paget Disease With Or Without frontotemporal Dementia 1 | VCP     | II-3               | 11                 | PMID:19208399 |
| Neurodevelopmental Disorder With Or Without Anomalies Of The Brain, Eye, Or Heart                | RERE    | Subject 4          | 87                 | PMID:27087320 |
| Bleeding Disorder, Platelet-Type, 15                                                             | ACTN1   | proband            | 5                  | PMID:24069336 |
| Encephalopathy, Neonatal Severe, With Lactic Acidosis And Brain Abnormalities                    | LIPT2   | P1                 | 16                 | PMID:28757203 |
| Cleidocranial Dysplasia                                                                          | RUNX2   | III:3              | 10                 | PMID:24966961 |
| Congenital Disorder Of Glycosylation, Type Iic                                                   | SLC35C1 | Proband 1          | 20                 | PMID:24403049 |
| Rubinstein-Taybi syndrome 2                                                                      | EP300   | 38                 | 26                 | PMID:29506490 |
| Craniofrontonasal syndrome                                                                       | EFNB1   | 3269               | 17                 | PMID:23335590 |
| Brugada syndrome 1                                                                               | SCN5A   | proband            | 3                  | PMID:31590245 |
| Amyotrophic Lateral Sclerosis 1                                                                  | SOD1    | patient            | 7                  | PMID:30236613 |
| Spastic Paraplegia 76, Autosomal Recessive                                                       | CAPN1   | R-III:1            | 5                  | PMID:27320912 |
| Hypotonia, Infantile, With Psychomotor Retardation And Characteristic Facies 3                   | TBCK    | D-II-1             | 27                 | PMID:27040692 |
| Ehlers-Danlos syndrome, Classic Type, 2                                                          | COL5A2  | patient            | 8                  | PMID:27656288 |
| Birt-Hogg-Dube syndrome                                                                          | FLCN    | 253                | 2                  | PMID:96481    |
| Diarrhea 3, Secretory Sodium, Congenital, With Or Without Other Congenital anomalies             | SPINT2  | two-month-old male | 13                 | PMID:29575628 |
| Robinow syndrome, Autosomal Recessive                                                            | ROR2    | Patient 2          | 19                 | PMID:24932600 |

---

|                                     |                                                                                                                                                               |
|-------------------------------------|---------------------------------------------------------------------------------------------------------------------------------------------------------------|
| <code>original</code>               | unaltered data from case report                                                                                                                               |
| <code>noise2</code>                 | two “random” HPO terms added                                                                                                                                  |
| <code>noise2*</code>                | like <code>noise2</code> but the original terms were replaced by a randomly chosen parent term                                                                |
| <code>noise2**</code>               | like <code>noise2</code> but the original terms were replaced by a randomly chosen grand-parent term                                                          |
| <code>allele<sup>-2</sup></code>    | remove all pathogenic alleles (i.e., remove one allele for dominant and two for recessive). Otherwise do not change the data                                  |
| <code>allele<sup>-2,**</sup></code> | remove all pathogenic alleles (i.e., remove one allele for dominant and two for recessive), replace all terms with a parent term and then add two noise terms |
| <code>terms-randomized</code>       | replace all HPO terms by “random” terms                                                                                                                       |
| <code>biallelic</code>              | limit the case reports to those describing autosomal recessive (biallelic) diseases                                                                           |
| <code>biallelic<sup>-1</sup></code> | same as <code>biallelic</code> but one of two pathogenic alleles is removed                                                                                   |
| <code>not</code>                    | 10 cases in which a negated (“not”) finding is important to the differential diagnosis (Table S4)                                                             |
| <code>not*</code>                   | same as <code>not</code> , but all negated terms are removed                                                                                                  |

---

**Table S3.** Approaches to add noise to the case report data (Phenopackets).

| Correct diagnosis                                                         | Differential diagnosis                                       | Differentiating feature                     |
|---------------------------------------------------------------------------|--------------------------------------------------------------|---------------------------------------------|
| Loeys-Dietz syndrome 4 [OMIM:614816]                                      | Marfan syndrome [OMIM:154700]                                | Ectopia lentis [HP:0001083]                 |
| Tietz albinism-deafness syndrome [OMIM:103500]                            | Waardenburg syndrome, type 2A [OMIM:193510]                  | Heterochromia iridis [HP:0001100]           |
| Hypochondroplasia [OMIM:146000]                                           | Achondroplasia [OMIM:100800]                                 | Trident hand [HP:0004060]                   |
| Osteogenesis imperfecta, type XII [OMIM:613849]                           | Osteogenesis imperfecta, type IV [OMIM:166220]               | Dentinogenesis imperfecta [HP:0000703]      |
| Spinal muscular atrophy with progressive myoclonic epilepsy [OMIM:159950] | Spinal and bulbar muscular atrophy of Kennedy [OMIM:313200]  | Elevated serum creatine kinase [HP:0003236] |
| Myotonia congenita, dominant [OMIM:160800]                                | Myotonic dystrophy 1 [OMIM:160900]                           | Muscle weakness [HP:0001324]                |
| Trichorhinophalangeal syndrome, type I [OMIM:190350]                      | Trichorhinophalangeal syndrome, type II [OMIM:150230]        | Intellectual disability [HP:0001249]        |
| GM1-gangliosidosis, type III [OMIM:230650]                                | GM1-gangliosidosis, type I [OMIM:230500]                     | Cherry red spot of the macula [HP:0010729]  |
| Megalocornea 1, X-linked [OMIM:309300]                                    | Glaucoma 3, primary congenital, A [OMIM:231300]              | Abnormal intraocular pressure [HP:0012632]  |
| Ectodermal dysplasia 9, hair/nail type [OMIM:614931]                      | Ectodermal dysplasia 1, hypohidrotic, X-linked [OMIM:305100] | Abnormality of the dentition [HP:0000164]   |

**Table S4.** Pairs of diseases whose differential diagnosis is defined in part by the absence of the phenotypic abnormality listed in the third column. For instance, Loeys-Dietz syndrome 4 is noted not to be characterized by ectopia lentis, while the phenotypically similar disease Marfan syndrome is [4]. In each case, the disease in the first column is explicitly annotated not to have the phenotype in question, and the disease in the second column is annotated to have the feature. These ten cases are included in the 384 case reports (Phenopackets) analyzed in this work.

| Tool                   | First published | VCF              | HPO | Web                      | Shell            | Assemblies | Last update |
|------------------------|-----------------|------------------|-----|--------------------------|------------------|------------|-------------|
| eXtasy [5]             | 2013            | ✓                | ✓   | ✓                        | ✓                | hg19       | 2013        |
| Exomiser [6, 7, 8]     | 2014            | ✓                | ✓   | ✗                        | ✓                | hg19, hg38 | 2019        |
| Phen-Gen [9]           | 2014            | ✓                | ✓   | ✓                        | ✓                | hg19       | 2014        |
| PhenoVar [10]          | 2014            | ✓ <sup>(a)</sup> | ✓   | ✓                        | ✗                | hg19       | 2017        |
| BierApp [11]           | 2014            | ✓                | ✓   | ✗ <sup>(no access)</sup> | ✗                | hg19       | 2016        |
| wANNOVAR [12]          | 2015            | ✓                | ✓   | ✓                        | ✗                | hg19, hg38 | 2019        |
| OVA [13]               | 2015            | ✓                | ✓   | ✓                        | ✗                | hg19       | 2015        |
| OMIM Explorer [14]     | 2016            | ✓                | ✓   | ✗ <sup>(no access)</sup> | ✗                | hg19       | 2016        |
| QueryOR [15]           | 2017            | ✓                | ✓   | ✗ <sup>(no access)</sup> | ✗                | hg19       | 2016        |
| GenIO [16]             | 2018            | ✓                | ✓   | ✓                        | ✗                | hg19       | 2017        |
| AMELIE/Phrank [17]     | 2019            | ✓                | ✓   | ✗ <sup>(b)</sup>         | ✗                | hg19       | 2019        |
| Phenoxome [18]         | 2019            | ✓                | ✓   | ✓                        | ✗                | hg19       | 2019        |
| DeepPVP [19]           | 2019            | ✓                | ✓   | ✗                        | ✗ <sup>(c)</sup> | hg19       | 2019        |
| MutationDistiller [20] | 2019            | ✓                | ✓   | ✓                        | ✗                | hg19       | 2019        |
| PhenoPro [21]          | 2019            | ✓                | ✓   | ✗ <sup>(no access)</sup> | ✗                | hg19       | 2019        |

**Table S5. Other tools for phenotype-driven exome/genome analysis.** Symbols: ✓ The tool has the capability denoted in the column. ✗ The tool does not have the capability denoted in the column. ✕ The publication describes the capability in question but it was not functional during the period of time this manuscript was being prepared (Sep.-Dec., 2019). Additional comments: (a) Requires registration, which is not working; (b) Web version of AMELIE not accepting jobs (attempted various times, October–December, 2020); (c) Install instructions failed on dependencies or docker file; (no access): Web server could not be accessed on multiple occasions.

## References

- [1] Sebastian Köhler, Marcel H Schulz, Peter Krawitz, Sebastian Bauer, Sandra Dölken, Claus E Ott, Christine Mundlos, Denise Horn, Stefan Mundlos, and Peter N Robinson. Clinical diagnostics in human genetics with semantic similarity searches in ontologies. *The American Journal of Human Genetics*, 85(4):457–464, 2009.
- [2] Roberta Roncarati, Chiara Viviani Anselmi, Peter Krawitz, Giovanna Lattanzi, Yskert von Kodolitsch, Andreas Perrot, Elisa di Pasquale, Laura Papa, Paola Portararo, Marta Columbaro, Alberto Forni, Giuseppe Faggian, Gianluigi Condorelli, and Peter N Robinson. Doubly heterozygous LMNA and TTN mutations revealed by exome sequencing in a severe form of dilated cardiomyopathy. *European journal of human genetics : EJHG*, 21:1105–1111, October 2013.
- [3] Satoko Kumada, Masaharu Hayashi, Kunimasa Arima, Hiroshi Nakayama, Kenji Sugai, Masayuki Sasaki, Kiyoko Kurata, and Michio Nagata. Renal disease in Arima syndrome is nephronophthisis as in other Joubert-related Cerebello-oculo-renal syndromes. *American journal of medical genetics. Part A*, 131:71–76, November 2004.
- [4] Yskert von Kodolitsch and Peter N Robinson. Marfan syndrome: an update of genetics, medical and surgical management. *Heart (British Cardiac Society)*, 93:755–760, June 2007.
- [5] Alejandro Sifrim, Dusan Popovic, Leon-Charles Tranchevent, Amin Ardeshirdavani, Ryo Sakai, Peter Konings, Joris R Vermeesch, Jan Aerts, Bart De Moor, and Yves Moreau. eXtasy: variant prioritization by genomic data fusion. *Nature methods*, 10:1083–1084, November 2013.
- [6] Peter N Robinson, Sebastian Köhler, Anika Oellrich, Sanger Mouse Genetics Project, Kai Wang, Christopher J Mungall, Suzanna E Lewis, Nicole Washington, Sebastian Bauer, Dominik Seelow, Peter Krawitz, Christian Gilissen, Melissa Haendel, and Damian Smedley. Improved exome prioritization of disease genes through cross-species phenotype comparison. *Genome research*, 24:340–348, February 2014.
- [7] Damian Smedley, Julius OB Jacobsen, Marten Jäger, Sebastian Köhler, Manuel Holtgrewe, Max Schubach, Enrico Siragusa, Tomasz Zemojtel, Orion J Buske, Nicole L Washington, et al. Next-generation diagnostics and disease-gene discovery with the Exomiser. *Nature Protocols*, 10(12):2004, 2015.
- [8] Damian Smedley, Max Schubach, Julius O B Jacobsen, Sebastian Köhler, Tomasz Zemojtel, Malte Spielmann, Marten Jäger, Harry Hochheiser, Nicole L Washington, Julie A McMurry, Melissa A Haendel, Christopher J Mungall, Suzanna E Lewis, Tudor Groza, Giorgio Valentini, and Peter N Robinson. A whole-genome analysis framework for effective identification of pathogenic regulatory variants in Mendelian disease. *American journal of human genetics*, 99:595–606, September 2016.
- [9] Asif Javed, Saloni Agrawal, and Pauline C Ng. Phen-Gen: combining phenotype and genotype to analyze rare disorders. *Nature methods*, 11:935–937, September 2014.
- [10] Yannis J Trakadis, Caroline Buote, Jean-François Therriault, Pierre-Étienne Jacques, Hugo Larochelle, and Sébastien Lévesque. PhenoVar: a phenotype-driven approach in clinical genomics for the diagnosis of polymalformative syndromes. *BMC medical genomics*, 7:22, May 2014.
- [11] Alejandro Alemán, Francisco Garcia-Garcia, Francisco Salavert, Ignacio Medina, and Joaquín Dopazo. A web-based interactive framework to assist in the prioritization of disease candidate genes in whole-exome sequencing studies. *Nucleic acids research*, 42:W88–W93, July 2014.
- [12] Hui Yang and Kai Wang. Genomic variant annotation and prioritization with ANNOVAR and wANNOVAR. *Nature protocols*, 10:1556–1566, October 2015.
- [13] Agne Antanaviciute, Christopher M Watson, Sally M Harrison, Carolina Lascelles, Laura Crinnion, Alexander F Markham, David T Bonthron, and Ian M Carr. OVA: integrating molecular and physical phenotype data from multiple biomedical domain ontologies with variant filtering for enhanced variant prioritization. *Bioinformatics (Oxford, England)*, 31:3822–3829, December 2015.

- [14] Regis A James, Ian M Campbell, Edward S Chen, Philip M Boone, Mitchell A Rao, Matthew N Bainbridge, James R Lupski, Yaping Yang, Christine M Eng, Jennifer E Posey, and Chad A Shaw. A visual and curatorial approach to clinical variant prioritization and disease gene discovery in genome-wide diagnostics. *Genome medicine*, 8:13, February 2016.
- [15] Loris Bertoldi, Claudio Forcato, Nicola Vitulo, Giovanni Birolo, Fabio De Pascale, Erika Feltrin, Riccardo Schiavon, Franca Anglani, Susanna Negrisolo, Alessandra Zanetti, Francesca D’Avanzo, Rosella Tomanin, Georgine Faulkner, Alessandro Vezzi, and Giorgio Valle. QueryOR: a comprehensive web platform for genetic variant analysis and prioritization. *BMC bioinformatics*, 18:225, April 2017.
- [16] Daniel Koile, Marta Cordoba, Maximiliano de Sousa Serro, Marcelo Andres Kauffman, and Patricio Yankilevich. GenIO: a phenotype-genotype analysis web server for clinical genomics of rare diseases. *BMC bioinformatics*, 19:25, January 2018.
- [17] Karthik A Jagadeesh, Johannes Birgmeier, Harendra Guturu, Cole A Deisseroth, Aaron M Wenger, Jonathan A Bernstein, and Gill Bejerano. Phrank measures phenotype sets similarity to greatly improve Mendelian diagnostic disease prioritization. *Genetics in medicine : official journal of the American College of Medical Genetics*, 21:464–470, February 2019.
- [18] Chao Wu, Batsal Devkota, Perry Evans, Xiaonan Zhao, Samuel W Baker, Rojeen Niazi, Kajia Cao, Michael A Gonzalez, Pushkala Jayaraman, Laura K Conlin, Bryan L Krock, Matthew A Deardorff, Nancy B Spinner, Ian D Krantz, Avni B Santani, Ahmad N Abou Tayoun, and Mahdi Sarmady. Rapid and accurate interpretation of clinical exomes using Phenoxome: a computational phenotype-driven approach. *European journal of human genetics : EJHG*, 27:612–620, April 2019.
- [19] Imane Boudellioua, Maxat Kulmanov, Paul N Schofield, Georgios V Gkoutos, and Robert Hoehndorf. DeepPVP: phenotype-based prioritization of causative variants using deep learning. *BMC bioinformatics*, 20:65, February 2019.
- [20] Daniela Hombach, Markus Schuelke, Ellen Knierim, Nadja Ehmke, Jana Marie Schwarz, Björn Fischer-Zirnsak, and Dominik Seelow. MutationDistiller: user-driven identification of pathogenic DNA variants. *Nucleic acids research*, 47:W114–W120, July 2019.
- [21] Zixiu Li, Feng Zhang, Yukai Wang, Yue Qiu, Yang Wu, Yulan Lu, Lin Yang, William J Qu, Huijun Wang, Wenhao Zhou, and Weidong Tian. PhenoPro: a novel toolkit for assisting in the diagnosis of Mendelian disease. *Bioinformatics (Oxford, England)*, 35:3559–3566, October 2019.
